1 *Connectome Harmonic Decomposition of Human Brain Dynamics Reveals a Landscape*  
2 *of Consciousness*

3  
4 Luppi A.I. <sup>a,b\*</sup>, Vohryzek J. <sup>c,d</sup>, Kringelbach M. L. <sup>c,d</sup>, Mediano P.A.M. <sup>e</sup>, Craig M. M. <sup>a,b</sup>, Adapa R. <sup>a</sup>,  
5 Carhart-Harris, R. L. <sup>f</sup>, Roseman, L. <sup>f</sup>, Pappas I. <sup>a,b,g</sup>, Finoia P. <sup>a,h</sup>, Williams G. B. <sup>b,i</sup>, Allanson J. <sup>b,j</sup>, Pickard  
6 J. D. <sup>b,h,i</sup>, Menon D. K. <sup>a</sup>, Atasoy S. <sup>c,d</sup>, & Stamatakis E.A. <sup>a,b</sup>

7  
8  
9 <sup>a</sup>Division of Anaesthesia, School of Clinical Medicine, University of Cambridge, Cambridge, United Kingdom

10 <sup>b</sup>Department of Clinical Neurosciences, University of Cambridge, Cambridge, United Kingdom

11 <sup>c</sup>Department of Psychiatry, University of Oxford, Oxford, United Kingdom

12 <sup>d</sup>Center for Music in the Brain, Aarhus University, Aarhus, Denmark

13 <sup>e</sup>Department of Psychology, University of Cambridge, Cambridge, United Kingdom

14 <sup>f</sup>Center for Psychedelic Research, Department of Brain Sciences, Imperial College London, London, United  
15 Kingdom

16 <sup>g</sup>Department of Psychology and Helen Wills Neuroscience Institute, University of California - Berkeley,  
17 Berkeley, California, USA

18 <sup>h</sup>Division of Neurosurgery, School of Clinical Medicine, University of Cambridge, Cambridge, United Kingdom

19 <sup>i</sup>Wolfson Brain Imaging Centre, University of Cambridge, Cambridge, United Kingdom

20 <sup>j</sup>Department of Neurosciences, Cambridge University Hospitals NHS Foundation, Addenbrooke's Hospital,  
21 Cambridge, United Kingdom

22 \*Corresponding author: email [al857@cam.ac.uk](mailto:al857@cam.ac.uk)

23  
24  
25  
26  
27  
28  
29  
30  
31  
32  
33  
34 **ABSTRACT**

35  
36 A central question in neuroscience is how cognition and consciousness arise from human  
37 brain activity. Here, we decompose cortical dynamics of resting-state functional MRI into  
38 their constituent elements: the harmonics of the human connectome. Mapping a wide  
39 spectrum of consciousness onto these elementary brain states reveals a generalisable  
40 connectome harmonic signature of loss of consciousness, whether due to anaesthesia or  
41 severe brain injury. Remarkably, its mirror-reversed image corresponds to the harmonic  
42 signature of the psychedelic state induced by ketamine or LSD, identifying meaningful

43 relationships between neurobiology, brain function, and conscious experience. The  
44 repertoire of connectome harmonics further provides a fine-tuned indicator of level of  
45 consciousness, sensitive to differences in anaesthetic dose and clinically relevant sub-  
46 categories of patients with disorders of consciousness. Overall, we reveal that the  
47 emergence of consciousness from human brain dynamics follows the same universal  
48 principles shared by a multitude of physical and biological phenomena: the mathematics  
49 of harmonic modes.

50  
51

## 52 MAIN TEXT

53

54 Relating subjective mental states to the underlying brain states remains a key challenge for  
55 contemporary neuroscience<sup>1</sup>. Despite recent advances, what remains elusive is a principled  
56 account of how the spatio-temporal brain dynamics that support consciousness<sup>1-7</sup>, arise  
57 from the interplay of cortical dynamics across the brain's anatomical connections<sup>8</sup>.

58

59 The emerging framework of connectome harmonic decomposition offers a way to bridge  
60 this gap, decomposing complex brain dynamics (derived e.g. from functional MRI) in  
61 terms of neurobiologically grounded, elementary brain states<sup>8-11</sup>. Just like human language  
62 can generate infinite meanings from recombination of a finite vocabulary, so the human  
63 brain can generate an endless variety of mental states, by recombining a finite set of neural  
64 building blocks. Mathematically, connectome harmonic decomposition (CHD) extends the  
65 well-known Fourier transform to the human brain<sup>8</sup>. Through the Fourier transform, any  
66 signal can be represented as a combination of fundamental sinusoids: the harmonic modes  
67 of a linear filter. Likewise, CHD decomposes any pattern of cortical activity into a set of  
68 universal basis functions of increasing spatial frequency (granularity): the harmonic modes  
69 of the human connectome<sup>8</sup>. Harmonic modes are ubiquitous across natural phenomena,  
70 ranging from acoustic vibrations and electron orbits, to animal coat patterns and

71 morphogenesis<sup>12,13</sup>. In the human brain, harmonic modes (termed connectome harmonics;  
72 though spherical harmonics have also been used<sup>14</sup>) emerge from the balance between  
73 neuronal excitation and inhibition interacting over anatomical connections<sup>8,13</sup>. Thus, CHD  
74 provides an avenue to decompose and compare brain dynamics across states of  
75 consciousness, in a way that is (i) universal across individuals, and (ii) grounded in brain  
76 anatomy and neurophysiology<sup>8</sup>: a shared vocabulary for the language of human brain  
77 activity, derived from fundamental mathematical principles. Here, we leverage the CHD  
78 framework to map the landscape of human consciousness, revealing how connectome  
79 harmonics orchestrate the emergence of different states of consciousness (Figure 1 and  
80 Supplementary Figure 1).

81

82

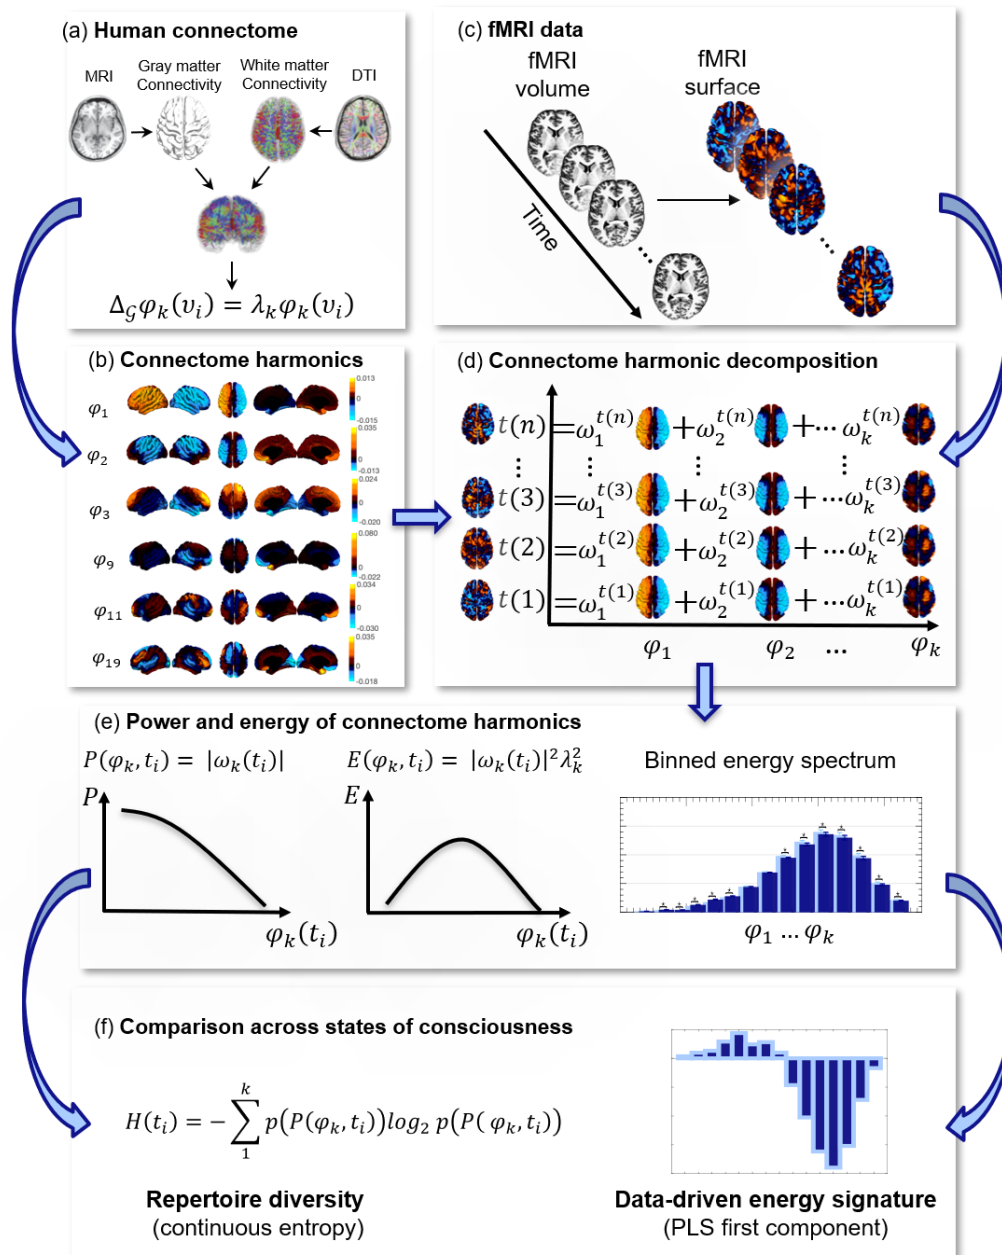

83

84

85 **Figure 1. Overview of connectome harmonics analysis framework.** (a) High-resolution rendering of  
 86 the human connectome is achieved by reconstructing the surface-based grey matter computed from  
 87 structural magnetic resonance imaging (sMRI) and the white-matter axonal tracts calculated with diffusion  
 88 tensor imaging (DTI). (b) Connectome harmonics are obtained as the eigenvectors of the graph Laplacian  
 89 applied to the human connectome. With an increasing connectome harmonic number  $k$ , we obtain more  
 90 complex and fine-grained spatial patterns. (c) Volumetric functional magnetic resonance imaging (fMRI)  
 91 data are projected onto the cortical surface for every timepoint  $t_i$ . (d) Connectome harmonic decomposition  
 92 (CHD) of the fMRI data estimates the contribution  $\omega_k(t_i)$  of individual harmonics  $\varphi_k$  to the cortical  
 93 activity at every timepoint  $t_i$ . **Measures of the connectome harmonic spectrum.** (e) The power spectrum

94 is estimated as the absolute contribution  $|\omega_k(t_i)|$  of individual harmonics  $\varphi_k$  to the fMRI data at every time  
95 point  $t_i$ . Similarly, the energy spectrum is estimated as the square of the absolute contribution  $|\omega_k(t_i)|$  of  
96 individual harmonics  $\varphi_k$  to the fMRI data, weighted by the square of the harmonics'  
97 corresponding eigenvalue  $\lambda_k$  at every time point  $t_i$ . The overall binned energy spectrum across subjects and  
98 timepoints is constructed by discretising the energy of connectome harmonics in 15 logarithmically-spaced  
99 frequency-specific bins, here shown for a target state (dark blue) and a reference state (light blue). (f)  
100 Repertoire entropy is defined as the entropy of the power spectrum at every timepoint  $t_i$ , computed with the  
101 continuous Kozachenko approximation; the data-driven energy signature of a target state of consciousness  
102 is obtained from the first principal component of Partial Least Squares-Discriminant Analysis (PLS-DA),  
103 which maximally discriminates the target state (dark blue) from the reference state (light blue), based on  
104 their respective connectome harmonic energy spectra.

105

## 106 [Connectome harmonic signatures of consciousness](#)

107

108 Previous work has shown that CHD can identify consistent signatures of the psychedelic  
109 state induced by the serotonin 5HT<sub>2A</sub> receptor agonists LSD and psilocybin, in terms of a  
110 shift in energy (normalised contribution) from low- to high-frequency harmonics,  
111 corresponding to increasingly complex neural dynamics<sup>8-10</sup>. The psychedelic state has  
112 been postulated to represent one end of the spectrum of conscious states<sup>15,16</sup>, with loss of  
113 consciousness at the opposite end, in terms of subjective experience as well as observable  
114 effects on brain function and dynamics<sup>7,17-21</sup> (however, see Bayne and Carter (2018)<sup>22</sup>). To  
115 map the complete spectrum of consciousness, we therefore investigated resting-state  
116 functional MRI (rs-fMRI) data from volunteers undergoing sedation with the intravenous  
117 anaesthetic, propofol<sup>23</sup> (N=15). As an agonist of the chief inhibitory neurotransmitter  
118 GABA, propofol enhances the activity of inhibitory interneurons, leading to globally  
119 increased neuronal inhibition<sup>24</sup>. Computational modelling has previously demonstrated  
120 that a shift in energy from high- to low-frequency harmonics (i.e. the opposite of what is  
121 observed with LSD and psilocybin<sup>8-10</sup>) can arise from reduced global excitation or  
122 increased global inhibition<sup>8,13</sup>. Therefore, computational and theoretical reasons converge  
123 to predict that propofol should induce connectome harmonic alterations that are the  
124 opposite of what is observed with psychedelics.

125

126

127

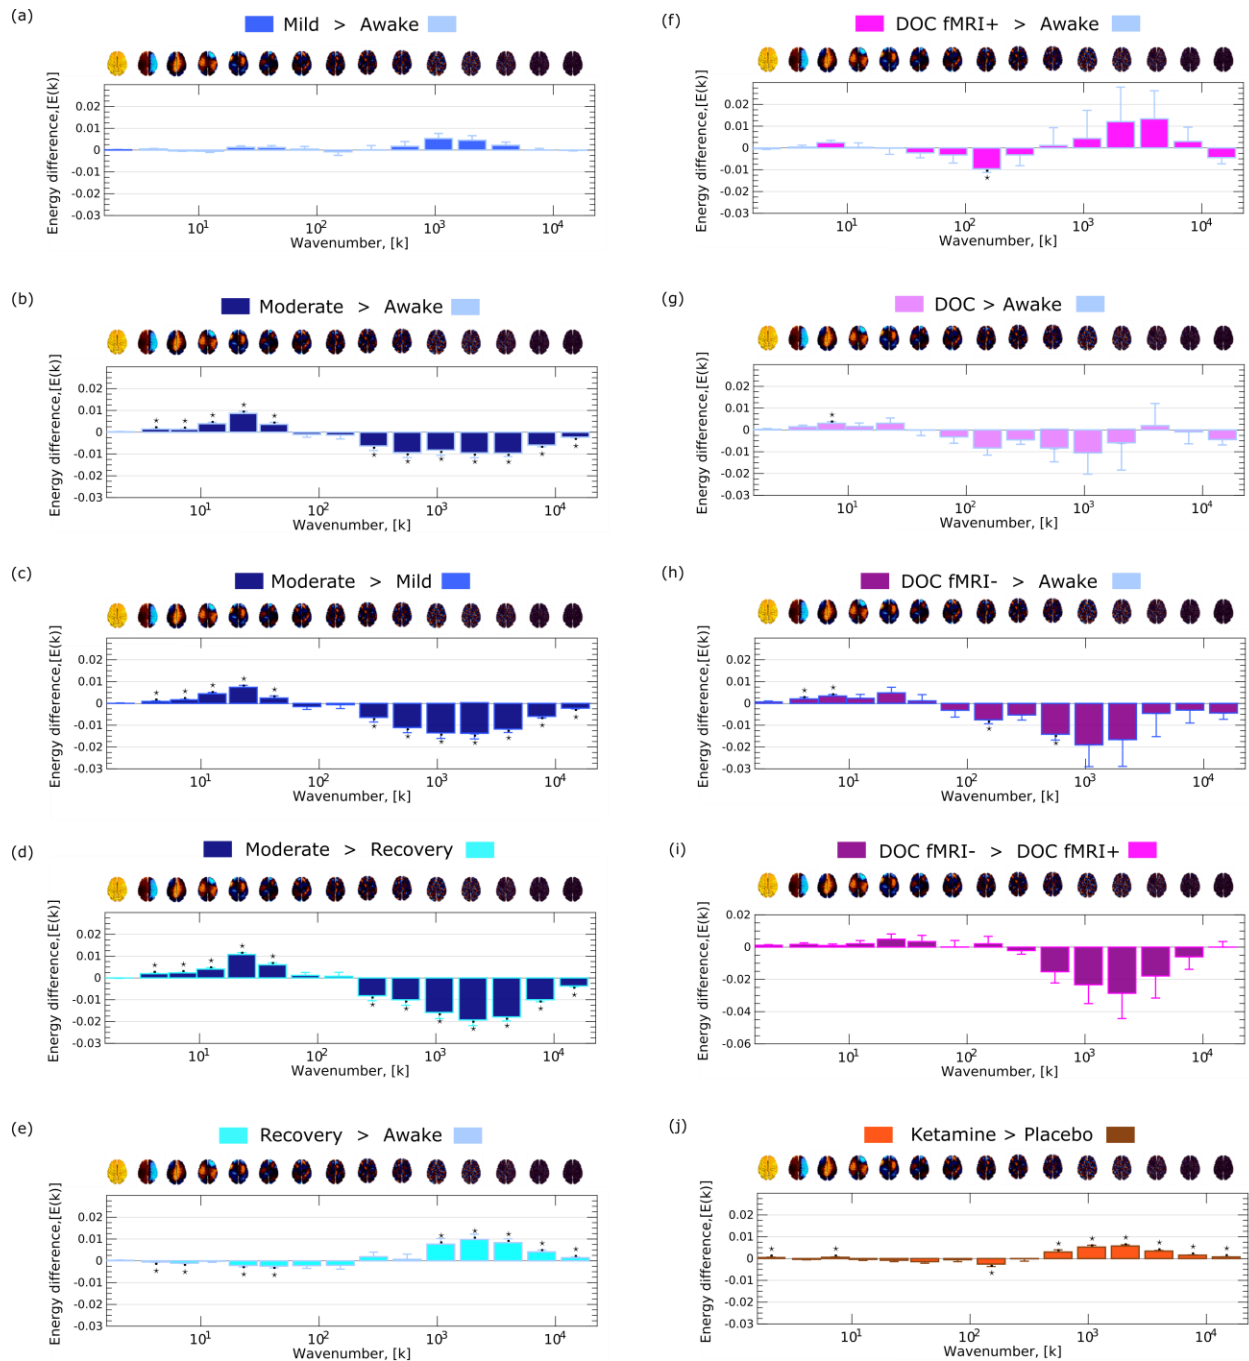

128

129 **Figure 2. Frequency-specific energy changes across states of consciousness.** (a) Mild propofol sedation  
 130 > wakefulness. (b) Moderate anaesthesia > wakefulness. (c) Moderate anaesthesia > mild sedation. (d)  
 131 Moderate anaesthesia > post-anaesthetic recovery. (e) Recovery > wakefulness. (f) DOC patients > awake  
 132 healthy controls. (g) DOC fMRI+ patients > awake healthy controls. (h) DOC fMRI- patients > awake  
 133 healthy controls. (i) fMRI- > fMRI+ DOC patients. (j) Ketamine > placebo. \*  $p < 0.05$ , FDR-corrected  
 134 across 15 frequency bins. A brain surface projection of the connectome harmonic pattern corresponding to  
 135 each frequency bin, averaged over the constituent spatial frequencies, is shown above each bin.

136

137

138 To further establish whether the connectome harmonic signature of anaesthesia is  
139 representative of other ways of losing consciousness, we also considered a cohort of N=22  
140 patients diagnosed with chronic disorders of consciousness arising from severe brain  
141 injury<sup>3</sup>. We investigated whether CHD could detect consciousness in a subset of patients  
142 who had previously exhibited evidence of covert consciousness by performing mental  
143 imagery tasks in the scanner<sup>25,26</sup> (in terms of specific brain regions activating when patients  
144 were asked to imagine playing tennis or navigating around their house) (fMRI+; N=8),  
145 compared with patients who had provided no such evidence (fMRI-; N=14).

146

147 Our results reveal a general connectome harmonic signature of loss of consciousness across  
148 anaesthesia and disorders of consciousness (Figure 2, Supplementary Figure 2 and  
149 Supplementary Table 1), characterised by a shift in the energy distribution from high to  
150 low-frequency harmonic modes - the opposite of the pattern previously observed with  
151 psychedelics<sup>9,10</sup>. These characteristic alterations of connectome harmonic energy are  
152 specific to loss of consciousness. Firstly, no significant energy alterations of the  
153 connectome harmonic spectrum are observed during a lower dose of propofol  
154 administration (mild sedation), when participants are still conscious. Instead, significant  
155 alterations are only observed during moderate anaesthesia, once participants have lost  
156 responsiveness. Secondly, the pattern observed during moderate anaesthesia is reversed  
157 upon awakening. Thirdly, the same connectome harmonic signature is also observed for  
158 chronic loss of consciousness induced by severe brain injury. A shift in energy from high  
159 to low frequencies was found when comparing controls with unconscious (fMRI-) DOC  
160 patients, with a similar trend also being evident when comparing the sub-groups of fMRI-  
161 and fMRI+ (covertly conscious) DOC patients. Finally, this putative unconsciousness-  
162 specific pattern of connectome harmonic energy was *not* observed when comparing fMRI+  
163 DOC patients with awake volunteers – as we should expect from a specific marker of  
164 unconsciousness, given that each fMRI+ patient had previously provided evidence of being  
165 covertly conscious.

166

167 Intriguingly, the opposite pattern (elevated energy in high-frequency connectome  
168 harmonics, and reduced energy in low-frequency ones) was observed when comparing  
169 post-anaesthetic recovery and pre-anaesthetic wakefulness – resembling the pattern  
170 previously observed with classic psychedelics<sup>9,10</sup>. Extending the Wilson-Cowan neural  
171 model to the human connectome, Atasoy and colleagues<sup>8</sup> have previously demonstrated  
172 that high-frequency harmonics emerge when excitation is increased, or inhibition is  
173 diminished. Recovery from anaesthesia corresponds to a gradual reduction of the  
174 (abnormally high) global inhibition induced by propofol. Thus, the resulting effects on the  
175 energy distribution should be the same as those observed when increasing global excitation  
176 (e.g. due to ketamine or LSD infusion), which is remarkably, precisely what we observed  
177 here. Though speculative, this account may explain the well-known phenomenon whereby  
178 individuals emerging from anaesthesia can exhibit symptoms of delirium, cognitive  
179 alterations, and even hallucinations<sup>27,28</sup>. Thus, our observed similarity between anaesthetic  
180 emergence and psychedelics may provide a link between physiology (reduced neuronal  
181 inhibition due to diminished levels of anaesthetic) and its corresponding cognitive  
182 manifestation.

183  
184 Having established that the connectome harmonic signature of loss of consciousness is the  
185 same regardless of its cause, we investigated whether connectome harmonics could also  
186 reveal a general signature of the psychedelic state. We reasoned that if the pattern of  
187 connectome harmonic alterations induced by the serotonergic psychedelics LSD and  
188 psilocybin<sup>9,10</sup> represents a general signature of the psychedelic state, then the same  
189 connectome harmonic signature should also be observed during psychedelic experiences  
190 induced by drugs that operate through different molecular mechanisms. We investigated  
191 this hypothesis with rs-fMRI data from N=20 volunteers undergoing infusion with a  
192 psychoactive (sub-anaesthetic) dose of the N-methyl-D-aspartate receptor antagonist  
193 ketamine<sup>29,30</sup>, which induces dissociative symptoms and is considered to be a useful model  
194 of psychosis<sup>29,31</sup> (although see<sup>32</sup>). Our results revealed an increase in the energy of high-  
195 frequency harmonics, analogous to that induced by LSD and psilocybin<sup>9,10</sup>.



196

197 The gradient from low- to high-frequency connectome harmonics reflects progressive  
198 decoupling of the corresponding neural activity from the underlying structural  
199 connectivity<sup>33</sup>. Thus, the psychedelic-induced energy shift to high-frequency harmonics  
200 indicates a departure from standard activity patterns encoded in the structural connectome,  
201 in favour of increasingly diverse ones - a plausible neural correlate for the  
202 phenomenologically rich state of mind induced by psychedelics<sup>8-10</sup>.

203

204

205 [Generalisability and predictive power of connectome harmonic signatures across states of](#)  
206 [consciousness](#)

207

208 The emergence of two mirror-reversed patterns of connectome harmonic energy, one for  
209 unconsciousness (whether due to anaesthesia or severe brain injury) and one for the  
210 psychedelic state (whether induced by ketamine or serotonergic psychedelics<sup>9,10</sup>), suggests  
211 that it should be possible to generalise these patterns across datasets to establish the  
212 harmonic signature of a) unconsciousness and b) psychedelic experience.

213

214 To pursue this hypothesis, we applied a data-driven technique known as Partial Least  
215 Squares - Discriminant Analysis (PLS-DA)<sup>34</sup>, to extract the multivariate pattern of  
216 connectome harmonic energy that maximally distinguished between each pair of  
217 conditions (termed multivariate signature, MVS; Supplementary Figure 3). We then  
218 projected each subject's energy spectrum onto the MVS characterising a given state of  
219 consciousness, to quantify their similarity (Methods). To investigate the generalisability of  
220 the connectome harmonic signature of ketamine to other psychedelics, the LSD data  
221 previously used by Atasoy and colleagues<sup>9,10</sup> were also included in this new analysis.

222

223 Supporting the notion that two mirror-reversed patterns characterise loss of consciousness  
224 and the psychedelic state, this analysis revealed similar projections for the multivariate

225 signatures (MVS) extracted from propofol anaesthesia (moderate vs awake) and from DOC  
226 patients (fMRI- vs fMRI+), which were opposite of the projections onto ketamine (vs  
227 placebo) and onto LSD (vs placebo) (Supplementary Figure 4 and Supplementary Table  
228 2). The observation that loss of consciousness and the psychedelic state have diametrically  
229 opposite harmonic signatures, also lends support for the intriguing possibility of employing  
230 psychedelics to treat disorders of consciousness<sup>35</sup>.

231

232 As an even more compelling demonstration that the signatures of unconsciousness  
233 extracted from CHD are truly generalisable across ways of losing consciousness, we show  
234 that individuals undergoing greater changes in propofol plasma concentration levels when  
235 transitioning from consciousness to unconsciousness and back, also exhibit larger  
236 differences in their correspondence to the harmonic pattern that discriminates between  
237 covertly conscious and unconscious DOC patients.

238

239 Specifically, the propofol-induced change in fMRI projection score onto the multivariate  
240 energy signature extracted from DOC patients, was significantly correlated with the change  
241 in serum propofol levels when transitioning from mild to moderate propofol anaesthesia  
242 (Spearman's  $\rho = 0.57$ ,  $CI_{95\%} [0.08, 0.84]$ ,  $p = 0.026$ ; Figure 3a). Likewise, the change in  
243 projection score onto the DOC MVS also predicted the change in serum propofol levels  
244 between moderate sedation and post-anaesthetic recovery (Spearman's  $\rho = 0.56$ ,  $CI_{95\%}$   
245  $[0.07, 0.83]$ ,  $p = 0.030$ ; Figure 3b).

246

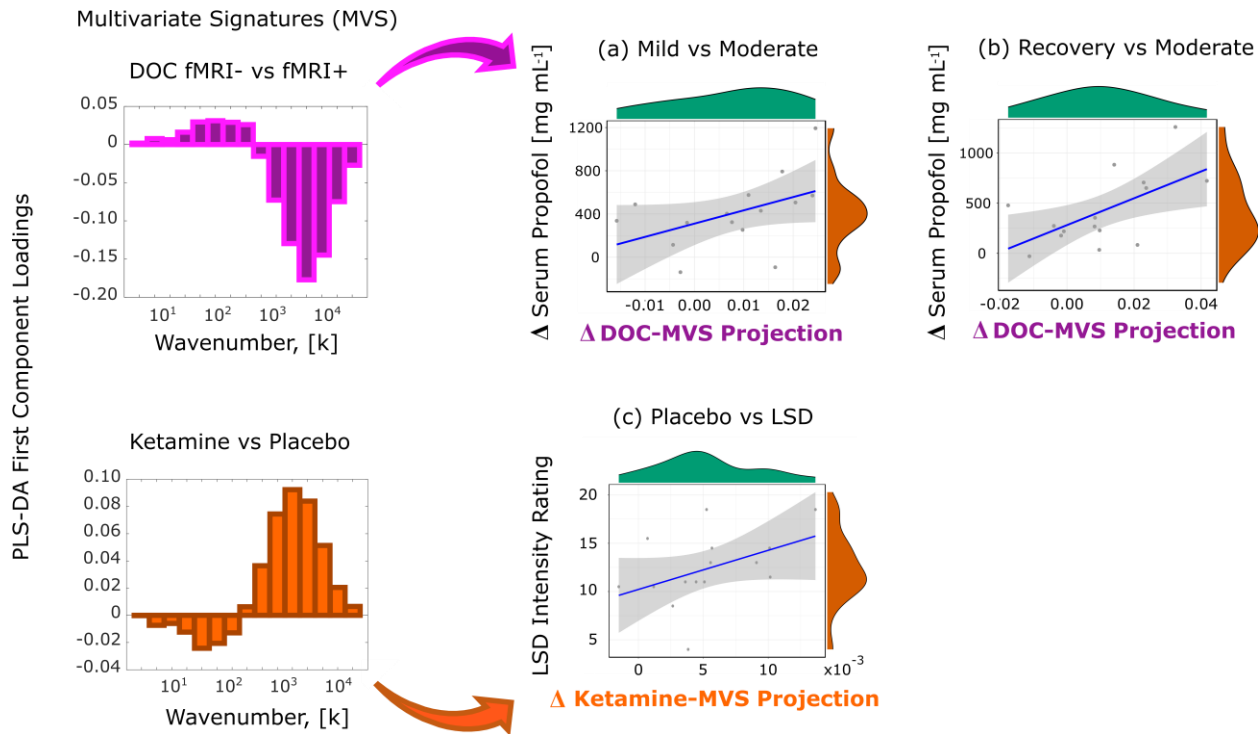

247

248 **Figure 3. Projection onto cross-dataset multivariate energy signatures (MVS) correlate with propofol**  
249 **levels between consciousness and unconsciousness, and subjective intensity of the LSD experience.**

250 (a) Scatterplot of the change (moderate anaesthesia minus mild) in connectome harmonic energy projection  
251 onto the multivariate energy signature (MVS) derived from the DOC dataset, versus the change in propofol  
252 levels in volunteers' blood serum, between mild and moderate propofol anaesthesia. (b) Scatterplot of the  
253 change (moderate minus recovery) in connectome harmonic energy projection onto the multivariate  
254 signature derived from the DOC dataset, versus the change in propofol levels in volunteers' blood serum,  
255 between moderate anaesthesia and recovery. (c) Scatterplot of the change (LSD minus placebo) in  
256 connectome harmonic energy projection onto the multivariate signature derived from the ketamine dataset,  
257 versus the subjective intensity of the psychedelic experience induced by LSD.

258

259

260 Furthermore, generalisability of connectome harmonic signatures also extends to the  
261 psychedelic state: the subjective intensity of the psychedelic experience induced by LSD,  
262 was predicted by the LSD-induced change in projection score onto the multivariate  
263 signature derived from ketamine (Spearman's  $\rho = 0.57$ ,  $CI_{95\%} [0.08, 0.84]$ ,  $p = 0.026$ ; Figure  
264 3c). Importantly, the same MVS projections were not significantly correlated with  
265 differences in subject motion, for both the propofol and LSD datasets, thereby excluding a  
266 potential confound (Supplementary Table 3 and Supplementary Figure 5). These findings  
267 identify general connectome harmonic signatures of conscious-to-unconscious transitions  
268 (and vice a versa) induced by both propofol anaesthesia and DOC, as well as general

269 signatures of the psychedelic experience, relating neural dynamics to subjective  
270 phenomenology.

271

272

273 [Repertoire diversity of connectome harmonics tracks level of consciousness](#)

274

275 Finally, we investigated whether the diversity of mental experiences during a given state  
276 of consciousness can be quantified in terms of diversity of connectome harmonic patterns  
277 contributing to brain activity – the central tenet of recent theoretical efforts seeking to  
278 establish a correspondence between the dynamics of mind and brain<sup>1,15</sup>.

279

280 We therefore quantified the diversity of the distribution of harmonic power (absolute  
281 magnitude of contribution) at each timepoint by means of the entropy of that distribution.  
282 The higher the value of this measure, which we term “harmonic repertoire diversity”, the  
283 wider the range of connectome harmonics that are recruited to compose cortical activity.  
284 Thus, states of diminished consciousness, where the diversity of mental content is limited,  
285 should be characterised by reduced entropy of the connectome harmonic repertoire,  
286 reflecting a more restricted repertoire of brain patterns. Conversely, increased repertoire  
287 diversity should be observed with ketamine and LSD, reflecting the high diversity of  
288 experiences occurring in the psychedelic state<sup>15,16</sup>.

289

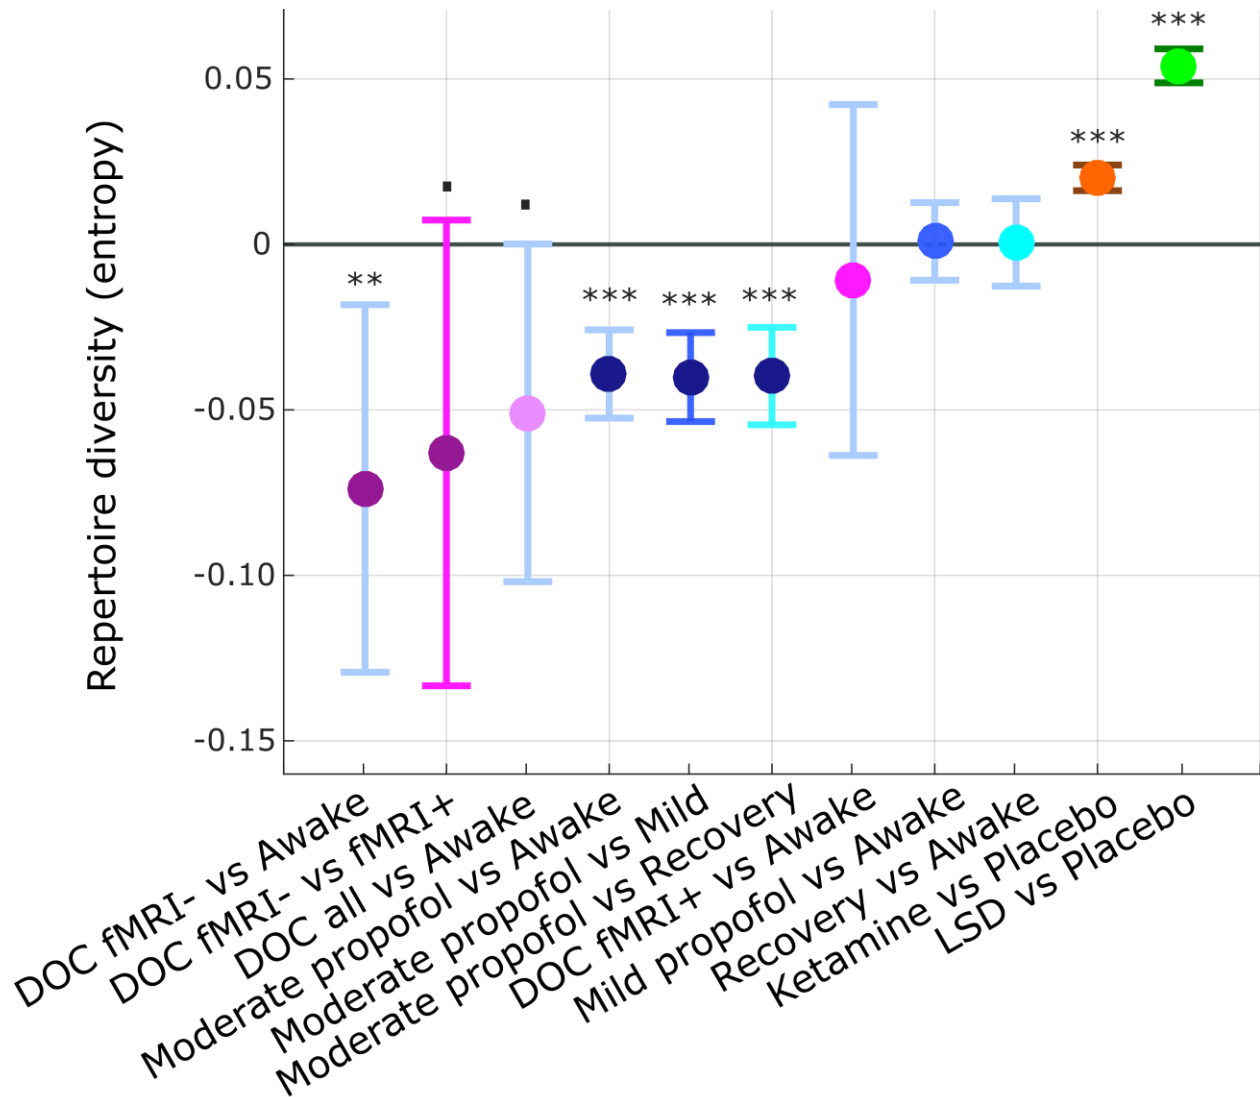

290

291 **Figure 4. Diversity of connectome harmonic repertoire tracks level of consciousness from loss of**  
292 **responsiveness to psychedelics.** Fixed effects (and 95% CI) of the comparison in repertoire diversity  
293 (entropy of connectome harmonic power distribution) between pairs of conditions (states of consciousness),  
294 treating condition as a fixed effect, and subjects as random effects. Timepoints were also included as  
295 random effects, nested within subjects. \*\*\*  $p < 0.001$ ; \*\*  $p < 0.01$ ; .  $p < 0.10$ .  
296

297 Our results support both of these predictions (Supplementary Table 4 and Figure 4).  
298 Ketamine and LSD exhibited significantly higher diversity of the repertoire of connectome  
299 harmonics than placebo, whereas moderate anaesthesia with propofol resulted in reduced  
300 diversity when compared with wakefulness, recovery, and even mild sedation. Conversely,  
301 neither of the latter conditions (during which volunteers were conscious) was significantly  
302 different from normal wakefulness in terms of their diversity of harmonic repertoire,

303 despite the presence of propofol in the blood in both cases - thereby indicating that diversity  
304 of the connectome harmonic repertoire tracks the level of consciousness rather than the  
305 mere presence of propofol.

306

307 Remarkably, our analysis revealed that DOC patients who had previously exhibited  
308 evidence of covert consciousness (fMRI+), also exhibited entropy levels approaching those  
309 of awake volunteers – in sharp contrast with fMRI- patients, who had provided no evidence  
310 of being conscious, and whose repertoire entropy was significantly compromised (Figure  
311 4 and Supplementary Table 3). Thus, our results demonstrate that the diversity of  
312 connectome harmonic repertoire (measured in terms of entropy) can track level of  
313 consciousness on a one-dimensional scale.

314

315 Although our results pertaining to DOC patients consistently followed the same pattern as  
316 moderate anaesthesia, they sometimes narrowly failed to reach statistical significance due  
317 to the large variability among patients - which is hardly unexpected since DOC are highly  
318 heterogeneous conditions, varying in the source, location and extent of brain damage.  
319 Although these results warrant caution until replicated in a different dataset, none of our  
320 conclusions rest solely on the results from the DOC dataset. We also acknowledge that loss  
321 of behavioural responsiveness during anaesthesia may not always coincide with loss of  
322 brain responsiveness and subjective experience<sup>36–38</sup>, and even failure to respond to the  
323 fMRI mental imagery tasks cannot conclusively rule out residual consciousness in DOC  
324 patients: future research may benefit from seeking convergence across different task-free  
325 neural correlates of consciousness<sup>37,39,40</sup>.

326

327 Nevertheless, it is noteworthy that although we stratified our DOC patients based on their  
328 performance on mental imagery tasks in the scanner, our connectome harmonic analysis  
329 was entirely based on resting-state (i.e., task-free) fMRI data, which imposes no cognitive  
330 demands on patients, unlike task-based paradigms<sup>39</sup>. Therefore, connectome harmonics  
331 analysis of re-fMRI may represent a useful screening tool in the clinic to identify patients

332 who may be covertly conscious – contributing to alleviate the high rate of misdiagnoses  
333 for DOC patients when relying solely on behavioural criteria<sup>39</sup>, while demonstrating the  
334 potential clinical value of CHD as a general neural marker of consciousness bypassing  
335 overt behaviour.

336

337 [Connectome harmonics as a framework to characterise conscious states](#)

338

339 Across multiple datasets, we demonstrate that the emergence of consciousness from human  
340 brain dynamics follows the same universal principles shared by a multitude of physical and  
341 biological phenomena across scales: the mathematics of harmonic modes. Diversity of the  
342 connectome harmonic repertoire can provide a useful one-dimensional indicator of level  
343 of consciousness, sensitive to differences in anaesthetic dose (mild sedation vs moderate  
344 anaesthesia vs recovery) as well as sub-categories of patients with disorders of  
345 consciousness. Being grounded in the brain’s anatomy and neurophysiology, connectome  
346 harmonics provide a mathematically principled explanatory framework to understand the  
347 loss of complexity that accompanies loss of consciousness. Namely, the collapse in the  
348 connectome harmonic repertoire reported here may constitute the link between  
349 neurobiology (propofol-induced global inhibition) and phenomenology (loss of subjective  
350 experience, i.e. unconsciousness) by restricting the set of states available to the brain.

351

352 Yet, connectome harmonics offer a richer characterisation of conscious states that goes  
353 beyond simple (though effective) complexity measures: the specific distribution of energy  
354 over connectome harmonics may be used to characterise the quality of various states of  
355 consciousness, in terms of being “unconscious-like” or “psychedelic-like” (or neither).  
356 Indeed, our analyses uncovered that the connectome harmonic signature of post-anaesthetic  
357 recovery (and, to a lesser extent, mild sedation), resembled the signature of the psychedelic  
358 state– even though diversity of the repertoire was near baseline levels.

359

360 Thus, composition of the energy spectrum and diversity of the harmonic repertoire provide  
361 distinct and synergistic insights to identify meaningful relationships between brain function  
362 and conscious experience. Having demonstrated its power and generalisability across  
363 datasets and states of consciousness, the framework of connectome harmonic  
364 decomposition may be especially useful in the characterisation of a wider set of mental  
365 states, from dreaming to psychosis.

366

367

368

## 369 MATERIALS AND METHODS

370

### 371 Ketamine Dataset

372

#### 373 Recruitment

374 A total of 21 participants (10 males; mean age 28.7 years, SD = 3.2 years) were recruited via  
375 advertisements placed throughout central Cambridge, UK. All participants underwent a screening  
376 interview in which they were asked whether they had previously been diagnosed or treated for any  
377 mental health problems and whether they had ever taken any psychotropic medications.  
378 Participants reporting a personal history of any mental health problems or a history of any  
379 treatment were excluded from the study. All participants were right-handed, were free of current  
380 of previous psychiatric or neurological disorder or substance abuse problems, and had no history  
381 of cardiovascular illness or family history of psychiatric disorder/substance abuse. The study was  
382 approved by the Cambridge Local Research and Ethics Committee, and all participants provided  
383 written informed consent in accordance with ethics committee guidelines. The acquisition and  
384 design are described in detail in a previous study<sup>29</sup>.

385

#### 386 Study Design

387 Participants were assessed on two occasions, separated by at least 1 week. On one occasion, they  
388 received a continuous computer-controlled intravenous infusion of a racemic ketamine solution  
389 (2 mg/ml) until a targeted plasma concentration of 100 ng/ml was reached. This concentration



390 was sustained throughout the protocol. A saline infusion was administered on the other occasion.  
391 Infusion order was randomly counterbalanced across participants. The infusion was performed  
392 and monitored by a trained anesthetist (RA) who was unblinded for safety reasons, but who  
393 otherwise had minimal contact with participants. At all other times, participants were supervised  
394 by investigators blinded to the infusion protocol. The participants remained blinded until both  
395 assessments were completed. All MRI and assessment procedures were identical across  
396 assessment occasions.

397

### 398 Infusion Protocol

399 Bilateral intravenous catheters were inserted into volunteers' forearms, one for infusion, and the  
400 other for serial blood sampling. We used a validated and previously implemented <sup>41</sup> three-  
401 compartment pharmacokinetic model to achieve a constant plasma concentration of 100 ng/ml  
402 using a computerized pump (Graseby 3500, Graseby Medical, UK). The infusion continued for  
403 15 min to allow stabilization of plasma levels. Blood samples were drawn before and after the  
404 resting fMRI scan and then placed on ice. Plasma was obtained by centrifugation and stored at  
405  $-70^{\circ}\text{C}$ . Plasma ketamine concentrations were measured by gas chromatography–mass  
406 spectrometry.

407

### 408 MRI Acquisition

409 Scanning was performed using a 3.0 T MRI scanner (Siemens Magnetom, Trio Tim, Erlangen,  
410 Germany) equipped with a 12-channel array coil located at the Wolfson Brain Imaging Centre,  
411 Addenbrooke's Hospital, Cambridge, UK. T2\*-weighted echo-planar images were acquired under  
412 eyes-closed resting-state conditions. Participants were instructed to close their eyes and let the  
413 minds wander without going to sleep. Subsequent participant debriefing ensured that no  
414 participants fell asleep during the scan. Imaging parameters were: 3x3x3.75mm voxel size, with a  
415 time-to-repetition (TR) of 2000 ms, time-to-echo (TE) of 30 ms, flip angle of 78° in 64x64 matrix  
416 size, and 240mm field of view (FOV). A total of 300 volumes comprising 32 slices each were  
417 obtained. In addition, high-resolution anatomical T1 images were acquired using a three-  
418 dimensional magnetic-prepared rapid gradient echo (MPPRAGE) sequence. In all, 176 contiguous  
419 sagittal slices of 1.0mm thickness using a TR of 2300 ms, TE of 2.98 ms, flip angle of 91°, and a  
420 FOV of 256mm in 240x256 matrix were acquired with a voxel size of 1.0mm<sup>3</sup>. One participant  
421 was excluded due to excessive movement, resulting in a final sample of N=20 subjects.

422

### 423 Preprocessing

424 We preprocessed the functional imaging data using a standard pipeline, implemented  
425 within the SPM12-based (<http://www.fil.ion.ucl.ac.uk/spm>) toolbox CONN  
426 (<http://www.nitrc.org/projects/conn>), version 17f<sup>42</sup>. The pipeline comprised the  
427 following steps: removal of the first five scans, to allow magnetisation to reach steady  
428 state; functional realignment and motion correction; slice-timing correction to account for  
429 differences in time of acquisition between slices; identification of outlier scans for  
430 subsequent regression by means of the quality assurance/artifact rejection software *art*  
431 ([http://www.nitrc.org/projects/artifact\\_detect](http://www.nitrc.org/projects/artifact_detect)); spatial normalisation to Montreal  
432 Neurological Institute (MNI-152) standard space with 2mm isotropic resampling  
433 resolution, using the segmented grey matter image from each volunteer's high-resolution  
434 T1-weighted image, together with an *a priori* grey matter template.

435

### 436 Denoising

437 To reduce noise due to cardiac and motion artifacts, we applied the anatomical CompCor method  
438 of denoising the functional data<sup>43</sup>, also implemented within the CONN toolbox. The anatomical  
439 CompCor method involves regressing out of the functional data the following confounding effects:  
440 the first five principal components attributable to each individual's white matter signal, and the  
441 first five components attributable to individual cerebrospinal fluid (CSF) signal; six subject-  
442 specific realignment parameters (three translations and three rotations) as well as their first- order  
443 temporal derivatives; the artifacts identified by *art*; and main effect of scanning condition<sup>43</sup>. Linear  
444 detrending was also applied, and the subject-specific denoised BOLD signal timeseries were band-  
445 pass filtered to eliminate both low-frequency drift effects and high-frequency noise, thus retaining  
446 temporal frequencies between 0.008 and 0.09 Hz. Importantly, note that this bandpass filtering  
447 pertains to temporal frequencies, which are distinct from the spatial frequencies obtained from  
448 connectome harmonic decomposition (as described below).

449

450

### 451 Propofol Dataset

452

## 453 Recruitment

454 Ethical approval for these studies was obtained from the Cambridgeshire 2 Regional Ethics  
455 Committee, and all subjects gave informed consent to participate in the study. Sixteen healthy  
456 volunteer subjects were recruited for scanning. The acquisition procedures are described in detail  
457 in a previous study <sup>23</sup>. In addition to the original 16 volunteers, data were acquired for nine  
458 additional participants using the same procedures, bringing the total number of participants in this  
459 dataset to 25 (11 males, 14 females; mean age 34.7 years, SD = 9.0 years).

460

## 461 Propofol Infusion Protocol

462 The GABA-ergic intravenous agent propofol is one of the most commonly used anaesthetic drugs,  
463 owing to the stability and predictability of its effects. Propofol was administered intravenously as  
464 a “target controlled infusion” (plasma concentration mode), using an Alaris PK infusion pump  
465 (Carefusion, Basingstoke, UK). Three target plasma levels were used - no drug (baseline), 0.6  
466 mg/ml (mild sedation) and 1.2 mg/ml (moderate sedation).

467 A period of 10 min was allowed for equilibration of plasma and effect-site propofol concentrations.  
468 Blood samples were drawn towards the end of each titration period and before the plasma target  
469 was altered, to assess plasma propofol levels. In total, 6 blood samples were drawn during the  
470 study. The mean (SD) measured plasma propofol concentration was 304.8 (141.1) ng/ml during  
471 mild sedation, 723.3 (320.5) ng/ml during moderate sedation and 275.8 (75.42) ng/ml during  
472 recovery. Mean (SD) total mass of propofol administered was 210.15 (33.17) mg, equivalent to  
473 3.0 (0.47) mg/kg. The level of sedation was assessed verbally immediately before and after each  
474 of the scanning runs. The three conditions from this dataset are referred to as Awake, Mild and  
475 Moderate sedation respectively. Two senior anaesthetists were present during scanning sessions  
476 and observed the subjects throughout the study from the MRI control room and on a video link  
477 that showed the subject in the scanner. Electrocardiography and pulse oximetry were performed  
478 continuously, and measurements of heart rate, non-invasive blood pressure, and oxygen saturation  
479 were recorded at regular intervals.

480

481

## 482 FMRI Data Acquisition

483 The acquisition procedures are described in detail in the original study <sup>23</sup>. Briefly, MRI data were  
484 acquired on a Siemens Trio 3T scanner (WBIC, Cambridge). Each functional BOLD volume  
485 consisted of 32 interleaved, descending, oblique axial slices, 3 mm thick with interslice gap of 0.75  
486 mm and in-plane resolution of 3 mm, field of view = 192x192 mm, repetition time = 2 s, acquisition  
487 time = 2 s, time echo = 30 ms, and flip angle 78. We also acquired T1-weighted structural images  
488 at 1 mm isotropic resolution in the sagittal plane, using an MPRAGE sequence with TR = 2250  
489 ms, TI = 900 ms, TE = 2.99 ms and flip angle = 9 degrees, for localization purposes. Of the 25  
490 healthy subjects, 15 were ultimately retained (7 males, 8 females): 10 were excluded, either  
491 because of missing scans (n=2), or due of excessive motion in the scanner (n=8, 5mm maximum  
492 motion threshold).

493

## 494 Preprocessing and Denoising

495 The same preprocessing and denoising procedures were followed as for the ketamine data.

496

## 497 Disorders of Consciousness Patient Dataset

498

## 499 Recruitment

500 A sample of 71 DOC patients was included in this study. Patients were referred from specialist  
501 rehabilitation settings as well as specialist nursing homes specifically identified in the ethics. All  
502 patients had been seen by a consultant neurologist or rehabilitation consultant before referral, to  
503 make diagnosis as part of multidisciplinary assessments. To be included in the study, patients must  
504 have had a DOC diagnosis, written informed consent to participation from their legal  
505 representative as well as the consent of their treating physician, and they must be capable of being  
506 transported to Addenbrooke's Hospital. The exclusion criteria included any medical condition that  
507 made it unsafe for the patient to participate (decision made by clinical personnel blinded to the  
508 specific aims of the study) or any reason they are unsuitable to enter the MRI scanner environment  
509 (e.g. non-MRI-safe implants), significant pre-existing mental health problems, or insufficient  
510 English pre injury. After admission to Addenbrooke's Hospital, each patient underwent clinical  
511 neurological and neuroimaging testing, with pre-MRI CT for shunt management if needed.  
512 Patients spent a total of five days (including arrival and departure days) at Addenbrooke's Hospital.

513 Coma Recovery Scale-Revised (CRS-R) assessments were recorded at least daily for the five days  
514 of admission. If behaviours were indicative of awareness at any time, patients were classified as  
515 MCS; otherwise UWS. We assigned MCS- or MCS+ sub-classification if behaviours were  
516 consistent throughout the week. The most frequent signs of consciousness in MCS- patients are  
517 visual fixation and pursuit, automatic motor reactions (e.g. scratching, pulling the bed sheet) and  
518 localisation to noxious stimulation whereas MCS+ patients can, in addition, follow simple  
519 commands, intelligibly verbalise or intentionally communicate<sup>44,45</sup>. Scanning occurred at the  
520 Wolfson Brain Imaging Centre, Addenbrooke's Hospital, between January 2010 and December  
521 2015; medication prescribed to each patient was maintained during scanning. Ethical approval for  
522 testing patients was provided by the National Research Ethics Service (National Health Service,  
523 UK; LREC reference 99/391). All clinical investigations were conducted in accordance with the  
524 Declaration of Helsinki.

525 As a focus of this study was on graph-theoretical properties of the brain, patients were  
526 systematically excluded from the final cohort analysed in this study based on the following criteria:  
527 1) large focal brain damage (i.e. more than 1/3 of one hemisphere) as stated by an expert in  
528 neuroanatomy blinded to the patients' diagnoses; 2) excessive head motion during  
529 resting state scanning (i.e. greater than 3mm in translation and/or 3 degrees in  
530 rotation); 3) suboptimal segmentation and normalization of images. A total of 22 adults (14 males,  
531 8 females; age range 17-70 years; mean time post injury: 13 months) meeting diagnostic criteria  
532 for Unresponsive Wakefulness Syndrome/Vegetative State (N = 10) or Minimally Conscious State  
533 (N = 12) due to brain injury were included in this study (Table 1).

534

535

536 Table 1: Demographic information for patients with Disorders of Consciousness.

| Sex | Age | Months post injury | Aetiology | Diagnosis | CRS-R Score | Tennis      | Spat Nav    | Classification |
|-----|-----|--------------------|-----------|-----------|-------------|-------------|-------------|----------------|
| M   | 46  | 23                 | TBI       | UWS       | 6           | no evidence | no evidence | fMRI-          |
| M   | 57  | 14                 | TBI       | MCS-      | 12          | no evidence | no evidence | fMRI-          |
| M   | 46  | 4                  | TBI       | MCS       | 10          | no evidence | no evidence | fMRI-          |
| M   | 35  | 34                 | Anoxic    | UWS       | 8           | no evidence | no evidence | fMRI-          |
| M   | 17  | 17                 | Anoxic    | UWS       | 8           | no evidence | positive    | fMRI+          |
| F   | 31  | 9                  | Anoxic    | MCS-      | 10          | no evidence | no evidence | fMRI-          |
| F   | 38  | 13                 | TBI       | MCS       | 11          | positive    | no evidence | fMRI+          |

|   |    |    |                |      |    |             |             |       |
|---|----|----|----------------|------|----|-------------|-------------|-------|
| M | 29 | 68 | TBI            | MCS  | 10 | SMA +ve     | PPA +ve     | fMRI+ |
| M | 23 | 4  | TBI            | MCS  | 7  | SMA +ve     | no evidence | fMRI+ |
| F | 70 | 11 | Cerebral bleed | MCS  | 9  | no evidence | no evidence | fMRI- |
| F | 30 | 6  | Anoxic         | MCS- | 9  | PMC +ve     | no evidence | fMRI+ |
| F | 36 | 6  | Anoxic         | UWS  | 8  | no evidence | PPA +ve     | fMRI+ |
| M | 22 | 5  | Anoxic         | UWS  | 7  | no evidence | no evidence | fMRI- |
| M | 40 | 14 | Anoxic         | UWS  | 7  | no evidence | no evidence | fMRI- |
| F | 62 | 7  | Anoxic         | UWS  | 7  | no evidence | no evidence | fMRI- |
| M | 46 | 10 | Anoxic         | UWS  | 5  | no evidence | no evidence | fMRI- |
| M | 21 | 7  | TBI            | MCS  | 11 | no evidence | no evidence | fMRI- |
| M | 67 | 14 | TBI            | MCS- | 11 | SMA +ve     | PPA +ve     | fMRI+ |
| F | 55 | 6  | Hypoxia        | UWS  | 12 | negative    | negative    | fMRI- |
| M | 28 | 14 | TBI            | MCS  | 8  | positive    | positive    | fMRI+ |
| M | 22 | 12 | TBI            | MCS  | 10 | negative    | negative    | fMRI- |
| F | 28 | 8  | ADEM           | UWS  | 6  | negative    | negative    | fMRI- |

537 CRS-R, Coma Recovery Scale-Revised; UWS, Unresponsive Wakefulness Syndrome; MCS, Minimally Conscious  
 538 State; TBI, Traumatic Brain Injury; fMRI-, negative responders to mental imagery task; fMRI+, positive responders  
 539 to mental imagery task; SMA, supplementary motor area; PPA, parahippocampal place area; PMC, pre-motor cortex.

540

541

#### 542 Stratification of DOC Patients into fMRI+ and fMRI-

543 Patients were stratified into two groups based on their ability to perform volitional tasks (mental  
 544 imagery) in the scanner. The mental imagery tasks used here have been previously used to assess  
 545 the presence of covert consciousness in DOC patients<sup>25,26</sup> and their validity has been confirmed  
 546 in healthy individuals<sup>46</sup>.

547

548 Patients were instructed to perform two mental imagery tasks. The first task involved motor  
 549 imagery (“tennis task”): each patient was asked to imagine being on a tennis court swinging their  
 550 arm to hit the ball back and forth with an imagined opponent. The second was a task of spatial  
 551 imagery (“navigation task”): the patient was required to imagine walking around the rooms of their  
 552 house, or the streets of a familiar city, and to visualise what they would see if they were there.  
 553 Each task comprised five cycles of alternating imagery and rest blocks, each lasting 30 seconds.  
 554 The two kinds of mental imagery blocks were cued with the spoken word “tennis” or “navigation”,  
 555 respectively, whereas the resting blocks were cued with the word “relax”, corresponding to  
 556 instructions for the patient to just stay still and keep their eyes closed.

557

558 Univariate fMRI analysis was conducted on all 22 patients for both the motor and spatial mental  
559 imagery tasks. The analyses were performed using FSL version 5.0.9  
560 (<https://fsl.fmrib.ox.ac.uk/fsl/fslwiki/>). The results of these analyses determined which patients  
561 would be placed in each classification condition. For each functional scan, a general linear model  
562 consisting of contrasting periods of rest and active imagery was computed. Results were  
563 considered significant at a cluster level of  $z > 2.3$  (corrected  $p < 0.05$ )<sup>26</sup>.

564

565 Patients who exhibited significantly greater brain activation during either of the volitional mental  
566 imagery tasks than rest (i.e. those who exhibited evidence of being able to respond to the task)  
567 were deemed to be covertly conscious (N = 8); for brevity, we refer to these positive responders  
568 as “fMRI+”. Conversely, we refer to patients who did not respond to either task (negative  
569 responders), and who therefore did not exhibit detectable evidence of covert consciousness (N =  
570 14), as “fMRI-”. (Table 1).

571

#### 572 Resting-state fMRI Data Acquisition

573 Resting-state fMRI was acquired for 10 minutes (300 volumes, TR=2000ms) using a Siemens Trio  
574 3T scanner (Erlangen, Germany). Functional images (32 slices) were acquired using an echo planar  
575 sequence, with the following parameters: 3 x 3 x 3.75mm resolution, TR = 2000ms, TE = 30ms,  
576 78 degrees FA. Anatomical scanning was also performed, acquiring high-resolution T1-weighted  
577 images with an MPRAGE sequence, using the following parameters: TR = 2300ms, TE = 2.47ms,  
578 150 slices, resolution 1 x 1 x 1mm.

579

#### 580 rsfMRI Preprocessing and Denoising

581 Due to the presence of deformations caused by brain injury, rather than relying on automated  
582 pipelines, patients’ brains were individually preprocessed using SPM12, with visual inspections  
583 after each step. Additionally, to further reduce potential movement artifacts, data underwent  
584 despiking with a hyperbolic tangent squashing function. The remaining preprocessing and  
585 denoising steps were the same as described above for the ketamine and propofol data.

586

587 [LSD Dataset](#)

588

589 [Recruitment](#)

590 This study was approved by the National Research Ethics Service Committee London–West  
591 London and was conducted in accordance with the revised declaration of Helsinki (2000), the  
592 International Committee on Harmonization Good Clinical Practice guidelines and National Health  
593 Service Research Governance Framework. Imperial College London sponsored the research,  
594 which was conducted under a Home Office license for research with schedule 1 drugs.

595

596 All participants were recruited via word of mouth and provided written informed consent to  
597 participate after study briefing and screening for physical and mental health. The screening for  
598 physical health included electrocardiogram (ECG), routine blood tests, and urine test for recent  
599 drug use and pregnancy. A psychiatric interview was conducted and participants provided full  
600 disclosure of their drug use history. Key exclusion criteria included: < 21 years of age, personal  
601 history of diagnosed psychiatric illness, immediate family history of a psychotic disorder, an  
602 absence of previous experience with a classic psychedelic drug (e.g. LSD, mescaline,  
603 psilocybin/magic mushrooms or DMT/ayahuasca), any psychedelic drug use within 6 weeks of the  
604 first scanning day, pregnancy, problematic alcohol use (i.e. > 40 units consumed per week), or a  
605 medically significant condition rendering the volunteer unsuitable for the study.

606

607 [LSD Infusion Protocol](#)

608 The data acquisition protocols were described in detail in a previous paper <sup>47</sup>, so we will describe  
609 them in brief here. Twenty healthy volunteers with a previous experience using psychedelic drugs  
610 were scanned. Patients underwent two scans, 14 days apart. On one day they were given a placebo  
611 (10-mL saline) and the other they were given an active dose of LSD (75 µg of LSD in 10-mL  
612 saline). The infusion (drug/placebo) was administered over 2 min and occurred 115min before the  
613 resting-state scans were initiated. After infusion, subjects had a brief acclimation period in a mock  
614 MRI scanner to prepare them for the experience of being in the real machine. ASL and BOLD  
615 scanning consisted of three seven-minute eyes closed resting state scans.

616

617 [fMRI Data Acquisition](#)

618 The first and third scans were eyes-closed, resting state without stimulation, while the



619 second scan involved listening to music; however, this scan was not used in this analysis. The  
620 precise length of each of the two BOLD scans included here was 7:20 minutes. Imaging was  
621 performed on a 3T GE HDx system. High-resolution anatomical images were acquired with 3D  
622 fast spoiled gradient echo scans in an axial orientation, with field of view = 256x256x192 and  
623 matrix = 256x256x129 to yield 1mm isotropic voxel resolution. TR/TE = 7.9/3.0ms; inversion  
624 time = 450ms; flip angle = 20.

625

626 BOLD-weighted fMRI data were acquired using a gradient echo planer imaging sequence, TR/TE  
627 = 2000/35ms, FoV = 220mm, 64x64 acquisition matrix, parallel acceleration factor = 2, 90 flip  
628 angle. Thirty five oblique axial slices were acquired in an interleaved fashion, each 3.4mm thick  
629 with zero slice gap (3.4mm isotropic voxels). One subject aborted the experiment due to anxiety  
630 and four others we excluded for excessive motion (measured in terms of frame-wise displacement),  
631 leaving 15 subjects for analysis (11 males, 4 females; mean age 30.5 years, SD = 8.0 years)<sup>47</sup>.

632

### 633 Preprocessing and Denoising

634 The same preprocessing and denoising procedures were followed as for the previous  
635 datasets.

636

637

### 638 Connectome Harmonic Decomposition

639

#### 640 Theoretical background

641 The core technique employed here relies on the recently developed framework of connectome  
642 harmonic decomposition (CHD)<sup>9,13</sup>. This technique allows patterns of brain activity derived from  
643 functional MRI over time to be decomposed into a linear combination of a finite number of  
644 orthogonal, synchronous brain states, the harmonic modes of the human structural connectome  
645 (i.e. the network of anatomical connections between brain regions).

646

647 Each of these elementary brain states, also referred to as a connectome harmonics, is a pattern of  
648 synchronised cortical activity associated with a specific spatial frequency (i.e. granularity),  
649 corresponding to an intrinsic spatial wavenumber,  $k$ . Connectome harmonic decomposition may

650 therefore be seen as an extension of the well-known Fourier transform to the human connectome,  
651 since the Fourier transform is a special case of harmonic mode decomposition applied to a 1D  
652 domain with cyclic boundary conditions. Crucially, however, it is important to note that the  
653 frequencies associated with each connectome harmonic are in the spatial rather than temporal  
654 domain, and should not be confused with the frequencies identified by Fourier transform in the  
655 temporal domain (e.g. for denoising of timeseries).

656

#### 657 Construction of structural connectome

658 In order to identify the harmonic modes of the human structural connectome, which form the basis  
659 function for our connectome harmonic decomposition of functional MRI data, we began by  
660 constructing a network of anatomical connectivity between brain regions. To this end, we used  
661 DTI and MRI data from an independent sample of 10 subjects from the Human Connectome  
662 Project (HCP; Principal Investigators: David Van Essen and Kamil Ugurbil; 1U54MH091657,  
663 funded by the 16 NIH Institutes and Centers that support the NIH Blueprint for Neuroscience  
664 Research and by the McDonnell Center for Systems Neuroscience at Washington University;  
665 <https://db.humanconnectome.org>). The workflow was the same as described in previous work by  
666 Atasoy and colleagues<sup>9,13</sup>.

667

668 Freesurfer (<http://freesurfer.net>) was used to reconstruct the cortical surfaces at the interface of  
669 white and grey matter based on the 0.7-mm resolution data from T1-weighted MRI. This resulted  
670 in a network representation of 20,484 nodes (10,242 nodes per hemisphere) for each subject.  
671 Subsequently, deterministic tractography was used to reconstruct cortico-cortical and thalamo-  
672 cortical white matter fibres. After coregistering each subject's DTI and cortical surface data, each  
673 of the 20,484 nodes of the reconstructed cortical surface network was used as a centre to initialise  
674 eight seeds for deterministic tractography, implemented with the MrDiffusion tool  
675 (<http://white.stanford.edu/newlm/index.php/MrDiffusion>). Tracking was terminated when  
676 fractional anisotropy (FA) was below a threshold of 0.3, with 20mm minimum tract length, and  
677 setting 30 degrees as the maximum allowed angle between consecutive tracking steps.

678

## 679 Extraction of connectome harmonics

680 The structural connectome of each subject was represented as a binary adjacency matrix  $A$ , such  
681 that for each pair  $i$  and  $j$  of the  $n = 20,484$  surface grey matter nodes,  $A_{ij}$  was set to 1 if a white  
682 matter tract existed connecting them or if they were adjacent in the gray matter cortical surface  
683 representation, and 0 otherwise, thereby yielding a symmetric (undirected) binary matrix<sup>13</sup>. The  
684 individual adjacency matrices were then averaged across the 10 subjects to obtain a group average  
685 matrix  $\bar{A}$ . We then define the degree matrix  $D$  of the graph as:

$$686 \quad D(i, i) = \sum_{j=1}^n \bar{A}(i, j). \quad (1)$$

687  
688 Following<sup>13,48</sup>, we compute the symmetric graph Laplacian  $\Delta_G$  on the group-average adjacency  
689 matrix  $\bar{A}$  that represents the human connectome, in order to estimate the connectome Laplacian  
690 (discrete counterpart of the Laplace operator  $\Delta^{48}$  applied to the network of human structural brain  
691 connectivity):

$$692 \quad \Delta_G = D^{-1/2} L D^{-1/2}, \text{ with } L = D - \bar{A}. \quad (2)$$

693  
694  
695 We then calculate the connectome harmonics  $\varphi_k$ ,  $k \in \{1, \dots, 18,715\}$  by solving the following  
696 eigenvalue problem:

$$697 \quad \Delta_G \varphi_k(v_i) = \lambda_k \varphi_k(v_i) \forall v_i \in V, \quad \text{with } 0 < \lambda_1 < \lambda_2 < \dots < \lambda_n, \quad (3)$$

698  
699  
700 where  $\lambda_k$ ,  $k \in \{1, \dots, n\}$  is the corresponding eigenvalue of the eigenfunction  $\varphi_k$ ,  $V$  is the set of  
701 cortical surface vertices and  $n$  represents the number of vertices. In other words,  $\lambda_k$  and  $\varphi_k$  are the  
702 eigenvalues and eigenvectors of the Laplacian of the human structural connectivity network,  
703 respectively. Therefore, if  $\varphi_k$  is the connectome harmonic pattern of the  $k^{\text{th}}$  spatial frequency, then  
704 the corresponding eigenvalue  $\lambda_k$  is a term relating to the intrinsic energy of the that particular  
705 harmonic mode.

## 706 707 Connectome-harmonic decomposition of fMRI data.

708 At each timepoint  $t \in \{1, \dots, T\}$  (corresponding to one TR), the fMRI data were projected onto  
709 cortical surface coordinates by means of the Human Connectome Project Workbench *-volume-to-*

710 *surface-mapping* tool. Then, the spatial pattern of cortical activity over vertices  $v$  at time  $t$ , denoted  
711 as  $F_t(v)$ , was decomposed as a linear combination of the set of connectome harmonics  $\Psi =$   
712  $\{\varphi_k\}_{k=1}^N$ :

713

$$714 \quad F_t = \omega_1(t)\varphi_1 + \omega_2(t)\varphi_2 + \dots + \omega_n(t)\varphi_n = \sum_{k=1}^n \omega_k(t)\varphi_k(v) \quad (4)$$

715  
716 with the contribution  $\omega_k(t)$  of each connectome harmonic  $\varphi_k$  at time  $t$  being estimated as the  
717 projection (dot product) of the fMRI data  $F_t(v)$  onto  $\varphi_k$ :

718

$$719 \quad \omega_k(t) = \langle F_t, \varphi_k \rangle. \quad (5)$$

720

## 722 Power and Energy of connectome harmonics

723 Once the fMRI cortical activation pattern at time  $t$  has been decomposed into a linear combination  
724 of connectome harmonics, the magnitude of contribution to cortical activity of each harmonic  $\varphi_k$ ,  
725  $k \in \{1, \dots, n\}$  (regardless of sign) at any given timepoint  $t$  ( $P(\varphi_k, t)$ ), called its “power” for  
726 analogy with the Fourier transform, is computed as the amplitude of its contribution:

727

$$728 \quad P(\varphi_k, t) = |\omega_k(t)|. \quad (6)$$

729

730  
731 In turn, the normalized frequency-specific contribution of each harmonic  $\varphi_k$ ,  $k \in \{1, \dots, n\}$  at  
732 timepoint  $t$ , termed “energy”, is estimated by combining the strength of activation (power) of a  
733 particular connectome harmonic with its own intrinsic energy given by  $\lambda_k^2$ :

734

$$735 \quad E(\varphi_k, t) = |\omega_k(t)|^2 \lambda_k^2. \quad (7)$$

736

737 Consequently, total brain energy at time  $t$  is given by

738

739 
$$E_{total}(t) = \sum_{k=1}^n |\omega_k(t)|^2 \lambda_k^2 = \|\Delta F_t(v)\|^2.$$
  
740 (8)

741

742 Since the Laplace operator  $\Delta$  represents the amount of activity flow, the latter part of Equation 8  
743 indicates that the total brain energy at a given point in time can be interpreted as the total cortical  
744 flow of neural activity at that time<sup>9</sup>.

745

746

#### 747 [Data-driven extraction of multivariate energy signatures](#)

748

749 Partial least squares (PLS, also known as Projection on Latent Spaces) is a multivariate statistical  
750 analysis used to identify relationships between sets of variables X (predictors) and Y (targets), in  
751 order to extract principal components as linear combinations of variables in each set that  
752 maximally covary with each other<sup>34</sup>. In the present case, for each pair of states of consciousness  
753 under comparison, X was the matrix of 15 binned energy values per subject (averaged over  
754 timepoints), and Y was the vector of binary classification between the two states (here, target vs  
755 baseline state of consciousness, e.g. anaesthetised vs awake, ketamine vs placebo, fMRI- vs fMRI+  
756 DOC, etc) – making this an application of Partial Least Squares Discriminant Analysis (PLS-DA),  
757 owing to the binary nature of Y<sup>49</sup>.

758

759 The first principal component extracted by PLS-DA represents the single most discriminative  
760 pattern present in the data, in terms of distinguishing observations (subjects) belonging to the two  
761 different classes (states of consciousness). Here, we refer to this pattern as the “multivariate  
762 signature” (MVS).

763

764 To determine the cross-dataset generalisability of multivariate signatures, we selected four source  
765 MVSs: one from the contrast between awake and moderate propofol anaesthesia; one from the  
766 contrast between fMRI+ and fMRI- DOC patients; one from the contrast between placebo and  
767 ketamine; and one from the contrast between placebo and LSD. For each subject and condition,  
768 each source MVS was projected onto the pattern of binned connectome harmonic energy at each  
769 timepoint, by taking their dot product. The result is a measure of the match between the relevant

770 multivariate signature and the harmonic energy, for each timepoint of each subject, which can then  
771 be compared across states of consciousness.

772

773

#### 774 Diversity of connectome harmonic repertoire

775

776 To quantify the diversity of the repertoire of connectome harmonics recruited at each point in time,  
777 we start by observing that a diverse repertoire is one in which different harmonic modes contribute  
778 in different degrees to brain activity – neither one single mode dominating (which would  
779 correspond to a periodic oscillation) nor every mode contributing the same as every other mode  
780 (which would correspond to white noise). To capture this  
781 intuition, we quantify repertoire diversity in terms of the entropy of the distribution of connectome  
782 harmonic power (absolute strength of contribution to the cortical activation pattern) at each  
783 timepoint, which we calculate for each timepoint of each subject.

784

785 Specifically, to deal with continuous data (as in the present case) we rely on the Kozachenko  
786 approximation, as implemented in the Java Information Dynamics Toolbox (JIDT;  
787 <http://jlizier.github.io/jidt/>)<sup>50</sup>. We note that when dealing with continuous variables, entropy can  
788 have negative values<sup>51</sup>, but its interpretation remains the same: a more entropic distribution (i.e.  
789 having a value of entropy closer to positive infinity) will correspond to a more diverse repertoire.

790

#### 791 Statistical Analysis

792

793 Linear Mixed Effects models (implemented as the MATLAB function *fitlme*) were used to assess  
794 the statistical significance of the differences between conditions (states of consciousness), treating  
795 condition as a fixed effect, and subjects as random effects. When one measurement was obtained  
796 for each timepoint, timepoints were also included as random effects, nested within subjects.  
797 Results are reported in terms of the fixed effect of condition, and the upper and lower bounds of  
798 its 95% confidence interval, with associated p-value. For comparison of frequency-specific  
799 harmonic energy, the False Discovery Rate for multiple comparisons across 15 frequency bins was  
800 controlled by means of the Benjamini-Hochberg procedure<sup>52</sup>.

801

802

## 803 Acknowledgements

804

805 AIL, JV and PAMM would like to thank Lena Dorfschmidt for co-organising OxBridge BrainHack  
806 2019, where this work began. We also thank all volunteers and patients who provided data.

807 **Funding:** This work was supported by grants from the UK Medical Research Council  
808 (U.1055.01.002.00001.01) [JDP]; The James S. McDonnell Foundation [JDP]; The Canadian  
809 Institute for Advanced research (CIFAR) [DKM and EAS]; The National Institute for Health  
810 Research (NIHR, UK), Cambridge Biomedical Research Centre and NIHR Senior Investigator  
811 Awards [JDP and DKM]; The British Oxygen Professorship of the Royal College of Anaesthetists  
812 [DKM]; The Stephen Erskine Fellowship, Queens' College, University of Cambridge [EAS]; The  
813 Evelyn Trust, Cambridge and the EoE CLAHRC fellowship [JA]; The Gates Cambridge Trust  
814 [AIL]; The Cambridge International Trust and the Howard Sidney Sussex Studentship [MMC];  
815 The Oon Khye Beng Ch'Hia Tsio Studentship for Research in Preventive Medicine, Downing  
816 College, University of Cambridge [IP]; The Wellcome Trust (grant no. 210920/Z/18/Z) [PAMM];  
817 The European Research Council Consolidator Grant CAREGIVING (615539) [MLK and SA];  
818 The Center for Music in the Brain, funded by the Danish National Research Foundation  
819 (DNRF117) [MLK, SA and JV]; The Centre for Eudaimonia and Human Flourishing, funded by  
820 the Pettit and Carlsberg Foundations [MLK]; The Imperial College President's Scholarship [LR];  
821 The Alex Mosley Charitable Trust [RLCH]; The Wellcome Trust Research Training Fellowship  
822 (grant no. 083660/Z/07/Z), Raymond and Beverly Sackler Studentship, and the Cambridge  
823 Commonwealth Trust [RA]. The ketamine study was funded by the Bernard Wolfe Health  
824 Neuroscience Fund and the Wellcome Trust. The original LSD study received support from a  
825 Crowd Funding Campaign and the Beckley Foundation, as part of the Beckley-Imperial Research  
826 Programme. The research was also supported by the NIHR Brain Injury Healthcare Technology  
827 Co-operative based at Cambridge University Hospitals NHS Foundation Trust and University of  
828 Cambridge. Data used to obtain the human connectome were provided by the Human Connectome  
829 Project, WU-Minn Consortium (Principal Investigators: David Van Essen and Kamil Ugurbil;  
830 1U54MH091657) funded by the 16 NIH Institutes and Centers that support the NIH Blueprint for

831 Neuroscience Research; and by the McDonnell Center for Systems Neuroscience at Washington  
832 University.

833

834 **Author contributions:** AIL, JV, EAS, SA and MLK conceived the study. AIL, JV, PAMM, SA,  
835 MLK and EAS designed the methodology and the analysis. AIL analysed the data. JV, PAMM,  
836 MMC, and IP contributed to data analysis. PF, GBW, JA, JDP, RA, DKM, EAS, LR, RLCH were  
837 involved in designing the original studies for which the present data were collected. PF, MMC,  
838 GBW, JA, EAS, RA, RLCH, LR all participated in data collection. AIL, EAS and SA wrote the  
839 manuscript with feedback from all co-authors.

840

841 **Conflicts of interest:** the authors declare that no conflicts of interest exist.

842 **Data and materials availability.** The datasets analysed during the current study can be made  
843 available on request. The CONN toolbox is freely available online  
844 (<http://www.nitrc.org/projects/conn>). The Java Information Dynamics Toolbox is freely available  
845 online: <https://github.com/jlizier/jidt>.

846

## 847 REFERENCES

848

- 849 1. Northoff, G., Wainio-Theberge, S. & Evers, K. Is temporo-spatial dynamics the common  
850 currency of brain and mind? In *Quest of Spatiotemporal Neuroscience*. (2019).  
851 doi:10.1016/j.pprev.2019.05.002
- 852 2. Demertzi, A. *et al.* Human consciousness is supported by dynamic complex patterns of  
853 brain signal coordination. *Sci. Adv.* **5**, 1–12 (2019).
- 854 3. Luppi, A. I. *et al.* Consciousness-specific dynamic interactions of brain integration and  
855 functional diversity. *Nat. Commun.* (2019).
- 856 4. Cao, B. *et al.* Abnormal dynamic properties of functional connectivity in disorders of  
857 consciousness. *NeuroImage Clin.* **24**, (2019).
- 858 5. Lord, L. D. *et al.* Dynamical exploration of the repertoire of brain networks at rest is  
859 modulated by psilocybin. *Neuroimage* **199**, 127–142 (2019).
- 860 6. Barttfeld, P. *et al.* Signature of consciousness in the dynamics of resting-state brain  
861 activity. *Proc. Natl. Acad. Sci.* **112**, 887–892 (2015).
- 862 7. Varley, T. F. *et al.* Consciousness & Brain Functional Complexity in Propofol  
863 Anaesthesia. *Sci. Rep.* **10**, (2020).
- 864 8. Atasoy, S., Deco, G., Kringelbach, M. & Pearson, J. Harmonic Brain Modes: A Unifying  
865 Framework for Linking Space and Time in Brain Dynamic. *Neurosci.* (2018).



- 866 doi:10.1177/1073858417728032
- 867 9. Atasoy, S. *et al.* Connectome-harmonic decomposition of human brain activity reveals  
868 dynamical repertoire re-organization under LSD. *Sci. Rep.* **7**, 1–18 (2017).
- 869 10. Atasoy, S., Vohryzek, J., Deco, G., Carhart-harris, R. L. & Kringelbach, M. L. Common  
870 neural signatures of psychedelics: Frequency-specific energy changes and repertoire  
871 expansion revealed using connectome-harmonic decomposition. **242**, (2018).
- 872 11. Wang, M. B., Owen, J. P., Mukherjee, P. & Raj, A. Brain network eigenmodes provide a  
873 robust and compact representation of the structural connectome in health and disease.  
874 *PLoS Comput. Biol.* **13**, (2017).
- 875 12. Murray, J. D. *Mathematical Biology II - Spatial Models and Biomedical Applications.*  
876 *Mathematical Biology II - Spatial Models and Biomedical Applications* (Springer, 2008).  
877 doi:10.1007/b98869
- 878 13. Atasoy, S., Donnelly, I. & Pearson, J. Human brain networks function in connectome-  
879 specific harmonic waves. *Nat. Commun.* **7**, (2016).
- 880 14. Gabay, N. C. & Robinson, P. A. Cortical geometry as a determinant of brain activity  
881 eigenmodes: Neural field analysis. *Phys. Rev. E* **96**, 32413 (2017).
- 882 15. Carhart-Harris, R. L. *et al.* The entropic brain: a theory of conscious states informed by  
883 neuroimaging research with psychedelic drugs. *Front. Hum. Neurosci.* **8**, 20 (2014).
- 884 16. Carhart-Harris, R. L. & Friston, K. J. REBUS and the anarchic brain: Toward a unified  
885 model of the brain action of psychedelics. *Pharmacol. Rev.* **71**, 316–344 (2019).
- 886 17. Schartner, M. M., Carhart-Harris, R. L., Barrett, A. B., Seth, A. K. &  
887 Muthukumaraswamy, S. D. Increased spontaneous MEG signal diversity for psychoactive  
888 doses of ketamine, LSD and psilocybin. *Sci. Rep.* **7**, 46421 (2017).
- 889 18. Schartner, M. *et al.* Complexity of multi-dimensional spontaneous EEG decreases during  
890 propofol induced general anaesthesia. *PLoS One* **10**, (2015).
- 891 19. Schartner, M. M. *et al.* Global and local complexity of intracranial EEG decreases during  
892 NREM sleep. *Neurosci. Conscious.* (2017). doi:10.1093/nc/niw022
- 893 20. Sarasso, S. *et al.* Consciousness and Complexity during Unresponsiveness Induced by  
894 Propofol, Xenon, and Ketamine. *CURBIO* **25**, 3099–3105 (2015).
- 895 21. Li, D. & Mashour, G. A. Cortical dynamics during psychedelic and anesthetized states  
896 induced by ketamine. *Neuroimage* **196**, 32–40 (2019).
- 897 22. Bayne, T. & Carter, O. Dimensions of consciousness and the psychedelic state. *Neurosci.*  
898 *Conscious.* **2018**, (2018).
- 899 23. Stamatakis, E. A., Adapa, R. M., Absalom, A. R. & Menon, D. K. Changes in resting  
900 neural connectivity during propofol sedation. *PLoS One* **5**, e14224 (2010).
- 901 24. Brown, E. N., Lydic, R. & Schiff, N. D. General Anesthesia, Sleep, and Coma. *N. Engl. J.*  
902 *Med.* **27**, 2638–50 (2010).
- 903 25. Owen, A. M. *et al.* Detecting awareness in the vegetative state. *Science (80-. ).* **313**, 1402  
904 (2006).
- 905 26. Monti, M. M. *et al.* Willful modulation of brain activity in disorders of consciousness. *N.*  
906 *Engl. J. Med.* **362**, 579–589 (2010).
- 907 27. Radtke, F. M. *et al.* Risk factors for inadequate emergence after anesthesia: Emergence  
908 delirium and hypoactive emergence. *Minerva Anesthesiol.* **76**, 394–404 (2010).
- 909 28. Xará, D., Silva, A., Mendonça, J. & Abelha, F. Inadequate emergence after anesthesia:  
910 emergence delirium and hypoactive emergence in the Postanesthesia Care Unit. *J. Clin.*  
911 *Anesth.* **25**, 439–446 (2013).

- 912 29. Dandash, O. *et al.* Selective Augmentation of Striatal Functional Connectivity Following  
913 NMDA Receptor Antagonism: Implications for Psychosis. *Neuropsychopharmacology* **40**,  
914 622–631 (2015).
- 915 30. Olney, J. W., Newcomer, J. W. & Farber, N. B. NMDA receptor hypofunction model of  
916 schizophrenia. *J. Psychiatr. Res.* **33**, 523–533 (1999).
- 917 31. Corlett, P. R., Honey, G. D. & Fletcher, P. C. Prediction error, ketamine and psychosis:  
918 An updated model. *J. Psychopharmacol.* **30**, 1145–1155 (2016).
- 919 32. Carhart-Harris, R. L., Brugger, S., Nutt, D. J. & Stone, J. M. Psychiatry’s next top model:  
920 Cause for a re-think on drug models of psychosis and other psychiatric disorders. *J.*  
921 *Psychopharmacol.* **27**, 771–778 (2013).
- 922 33. Preti, M. G. & Van De Ville, D. Decoupling of brain function from structure reveals  
923 regional behavioral specialization in humans. *Nat. Commun.* **10**, (2019).
- 924 34. Krishnan, A., Williams, L. J., McIntosh, A. R. & Abdi, H. Partial Least Squares (PLS)  
925 methods for neuroimaging: A tutorial and review. *Neuroimage* **56**, 455–475 (2011).
- 926 35. Scott, G. & Carhart-Harris, R. L. Psychedelics as a treatment for disorders of  
927 consciousness. *Neurosci. Conscious.* **2019**, niz003 (2019).
- 928 36. Huang, Z. *et al.* Brain imaging reveals covert consciousness during behavioral  
929 unresponsiveness induced by propofol. *Sci. Rep.* **8**, 1–11 (2018).
- 930 37. Ní Mhuirheartaigh, R., Warnaby, C., Rogers, R., Jbabdi, S. & Tracey, I. Slow-wave  
931 activity saturation and thalamocortical isolation during propofol anesthesia in humans. *Sci.*  
932 *Transl. Med.* **5**, 208ra148 (2013).
- 933 38. Leslie, K. *et al.* Dreaming and Electroencephalographic Changes during Anesthesia  
934 Maintained with Propofol or Desflurane. *Anesthesiology* **111**, 547–555 (2009).
- 935 39. Naci, L., Sinai, L. & Owen, A. M. Detecting and interpreting conscious experiences in  
936 behaviorally non-responsive patients. *Neuroimage* (2015).  
937 doi:10.1016/j.neuroimage.2015.11.059
- 938 40. Casali, A. G. *et al.* A Theoretically Based Index of Consciousness Independent of Sensory  
939 Processing and Behavior. in *Science translational medicine* **5**, 1–10 (2013).
- 940 41. Corlett, P. R. *et al.* Frontal responses during learning predict vulnerability to the  
941 psychotogenic effects of ketamine: Linking cognition, brain activity, and psychosis. *Arch.*  
942 *Gen. Psychiatry* **63**, 611–621 (2006).
- 943 42. Whitfield-Gabrieli, S. & Nieto-Castanon, A. Conn: A Functional Connectivity Toolbox  
944 for Correlated and Anticorrelated Brain Networks. *Brain Connect.* **2**, 125–141 (2012).
- 945 43. Behzadi Y, Restom K, Liao J & Liu TT. A component based noise correction method  
946 (CompCor) for BOLD and perfusion based fMRI. *Neuroimage* **37**, 90–101 (2007).
- 947 44. Bruno, M.-A., Vanhaudenhuyse, A., Thibaut, A., Moonen, G. & Laureys, S. From  
948 unresponsive wakefulness to minimally conscious PLUS and functional locked-in  
949 syndromes: recent advances in our understanding of disorders of consciousness. *J. Neurol.*  
950 **258**, 1373–1384 (2011).
- 951 45. Wannez, S. *et al.* Prevalence of coma-recovery scale-revised signs of consciousness in  
952 patients in minimally conscious state. *Neuropsychol. Rehabil.* **28**, 1350–1359 (2018).
- 953 46. Fernández-Espejo, D., Norton, L. & Owen, A. M. The clinical utility of fMRI for  
954 identifying covert awareness in the vegetative state: A comparison of sensitivity between  
955 3T and 1.5T. *PLoS One* **9**, (2014).
- 956 47. Carhart-Harris, R. L. *et al.* Neural correlates of the LSD experience revealed by  
957 multimodal neuroimaging. *Proc. Natl. Acad. Sci.* **113**, 201518377 (2016).

- 958 48. Chung, F. *Spectral Graph Theory*. (American Mathematical Society, 1997).  
959 49. Chuen Lee, L., Liong, C.-Y. & Aziz Jemain, A. Partial least squares-discriminant analysis  
960 (PLS-DA) for classification of high-dimensional (HD) data: a review of contemporary  
961 practice strategies and knowledge gaps †. *Analyst* **143**, 3526 (2018).  
962 50. Lizier, J. T. JIDT: An Information-Theoretic Toolkit for Studying the Dynamics of  
963 Complex Systems. *Front. Robot. AI* **1**, 1–37 (2014).  
964 51. Cover, T. M. & Thomas, J. A. *Elements of Information Theory*. *Elements of Information*  
965 *Theory* (Wiley-Interscience, 2005). doi:10.1002/047174882X  
966 52. Benjamini, Y. & Hochberg, Y. Controlling the False Discovery Rate: A Practical and  
967 Powerful Approach to Multiple Testing. *J. R. Stat. Soc. Ser. B* **57**, 289–300 (1995).

1  
2  
3  
4  
5  
6  
7  
8  
9

Supplementary Information for:  
*Connectome Harmonic Decomposition of Human Brain Dynamics Reveals a  
Landscape of Consciousness*

Luppi A.I. <sup>a,b\*</sup>, Vohryzek J. <sup>c,d</sup>, Kringelbach M. L. <sup>c,d</sup>, Mediano P.A.M. <sup>e</sup>, Craig M. M. <sup>a,b</sup>, Adapa R. <sup>a</sup>,  
Carhart-Harris, R. L. <sup>f</sup>, Roseman, L. <sup>f</sup>, Pappas I. <sup>a,b,g</sup>, Finoia P. <sup>a,h</sup>, Williams G. B. <sup>b,i</sup>, Allanson J. <sup>b,j</sup>, Pickard  
J. D. <sup>b,h,i</sup>, Menon D. K. <sup>a</sup>, Atasoy S. <sup>c,d</sup>, & Stamatakis E.A. <sup>a,b</sup>

10  
11

Supplementary Figures

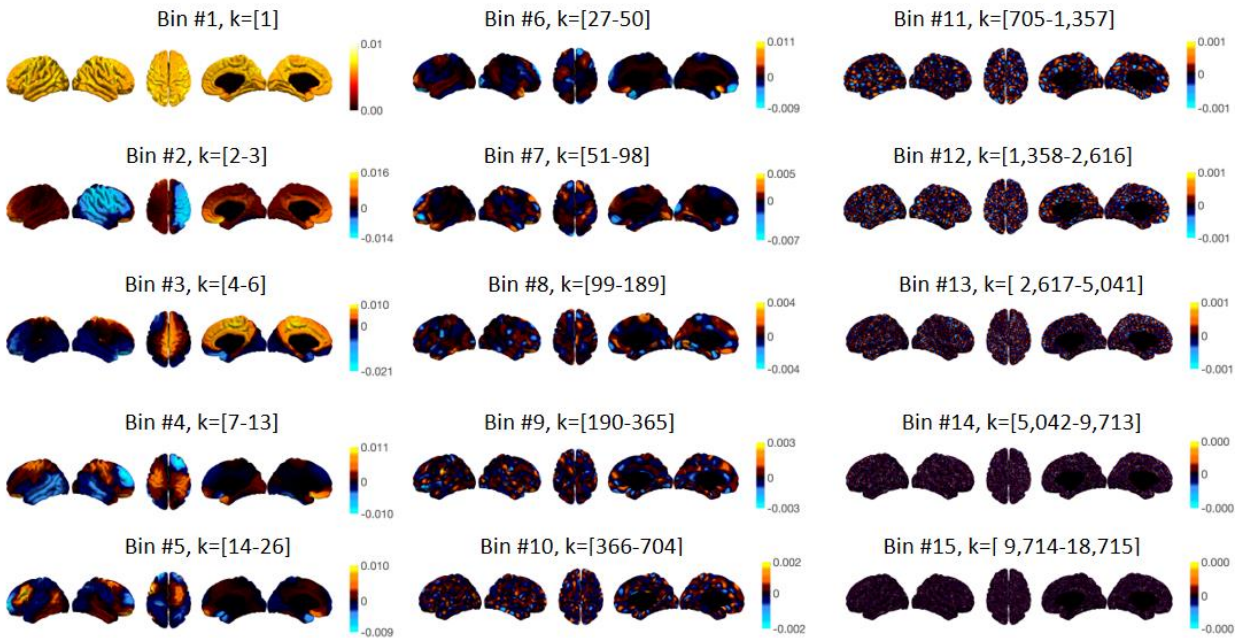

12  
13  
14  
15  
16  
17  
18

**Supplementary Figure 1. Binned connectome harmonics.** Surface projections of connectome harmonics averaged over each of 15 logarithmically spaced bins (with corresponding wavenumbers  $k$  indicated in braces), showing the progressive increase in complexity and granularity of the connectome harmonic patterns, with increasing spatial frequency.

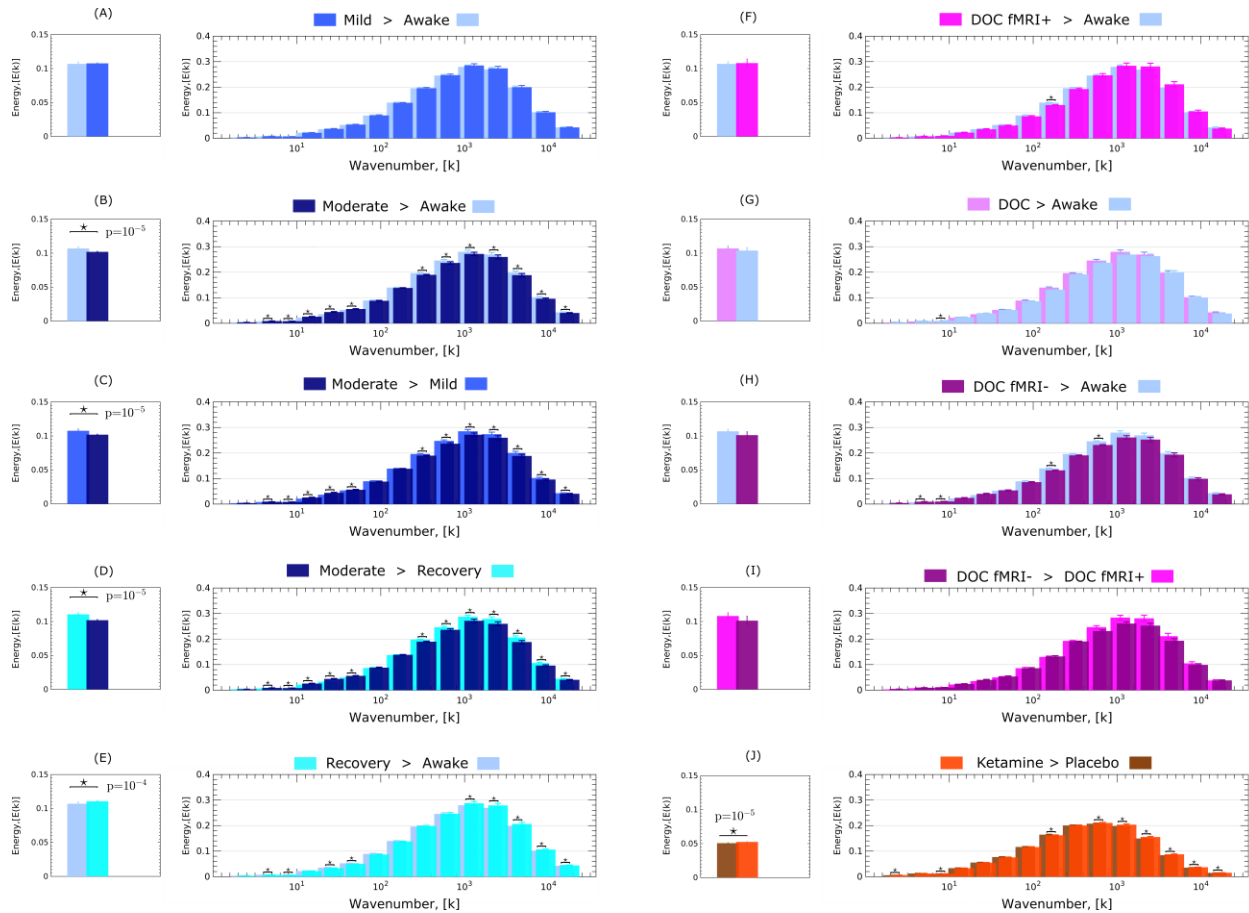

19

20 **Supplementary Figure 2. Energy levels across states of consciousness.** (a) Total energy (left) and frequency-  
 21 specific energy of connectome harmonics (right) for Mild propofol sedation vs wakefulness. (b) Total energy (left)  
 22 and frequency-specific energy of connectome harmonics (right) for Moderate anaesthesia vs wakefulness. (c) Total  
 23 energy (left) and frequency-specific energy of connectome harmonics (right) for Moderate anaesthesia vs mild  
 24 sedation. (d) Total energy (left) and frequency-specific energy of connectome harmonics (right) for Moderate  
 25 anaesthesia vs post-anaesthetic recovery. (e) Total energy (left) and frequency-specific energy of connectome  
 26 harmonics (right) for Recovery vs wakefulness. (f) Total energy (left) and frequency-specific energy of connectome  
 27 harmonics (right) for DOC patients vs awake healthy controls. (g) Total energy (left) and frequency-specific energy  
 28 of connectome harmonics (right) for DOC fMRI+ patients vs awake healthy controls. (h) Total energy (left) and  
 29 frequency-specific energy of connectome harmonics (right) for DOC fMRI- patients vs awake healthy controls. (i)  
 30 Total energy (left) and frequency-specific energy of connectome harmonics (right) for fMRI- vs fMRI+ DOC patients.  
 31 (j) Ketamine > placebo. \*  $p < 0.05$  (FDR-corrected across 15 frequency bins, for the frequency-specific analysis).  
 32

33

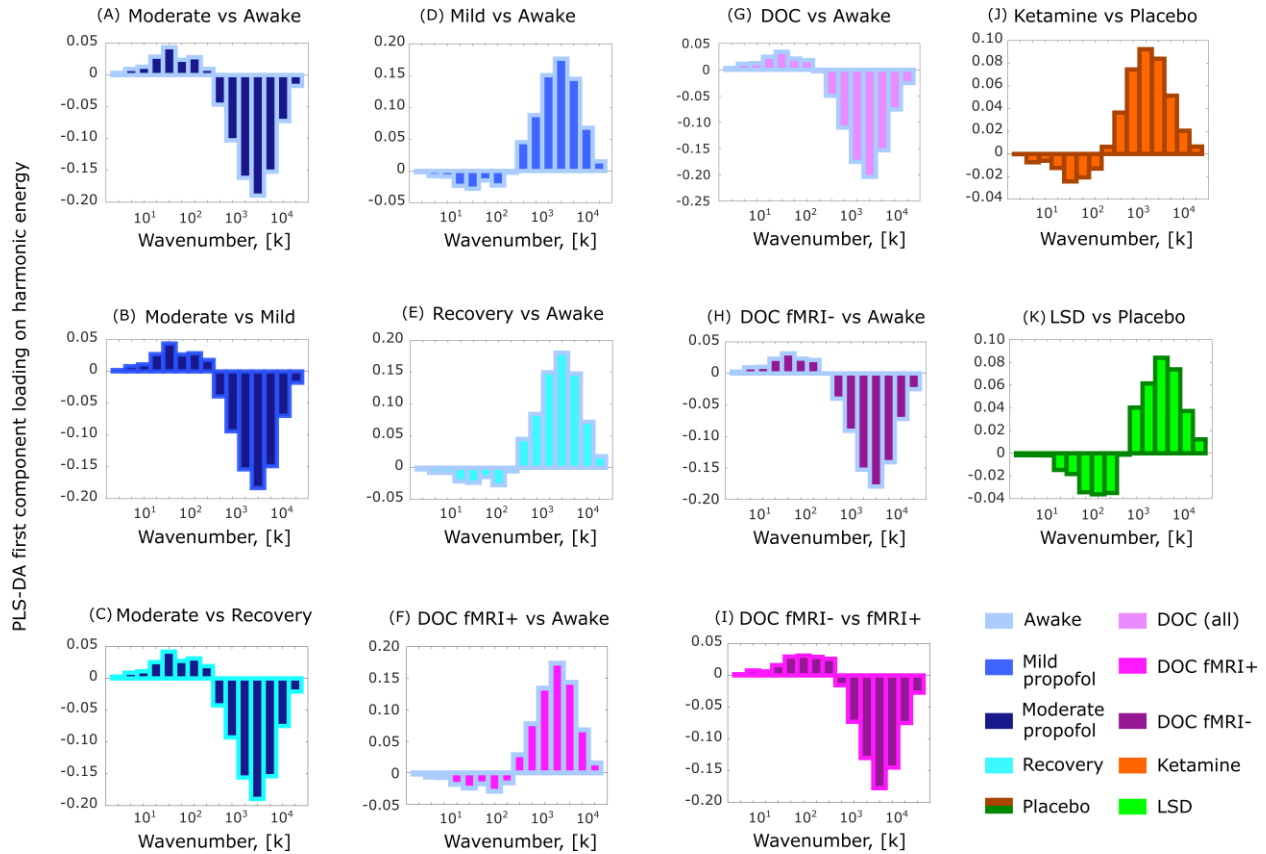

34

35 **Supplementary Figure 3. Similarity of PLS-DA maximally discriminative components of connectome harmonic**  
 36 **energy between states of consciousness.** (a) Moderate anaesthesia > wakefulness. (b) Moderate anaesthesia > mild  
 37 sedation. (c) Moderate anaesthesia > post-anaesthetic recovery. (d) Mild sedation > wakefulness. (e) Post-anaesthetic  
 38 recovery > wakefulness. (f) DOC fMRI+ patients > awake healthy controls. (g) DOC patients > awake healthy  
 39 controls. (h) DOC fMRI- patients > awake healthy controls. (i) fMRI- > fMRI+ DOC patients. (j) Ketamine > placebo.  
 40 (k) LSD > placebo. Bar colour indicates the target state; contours indicate the reference state.

41  
 42

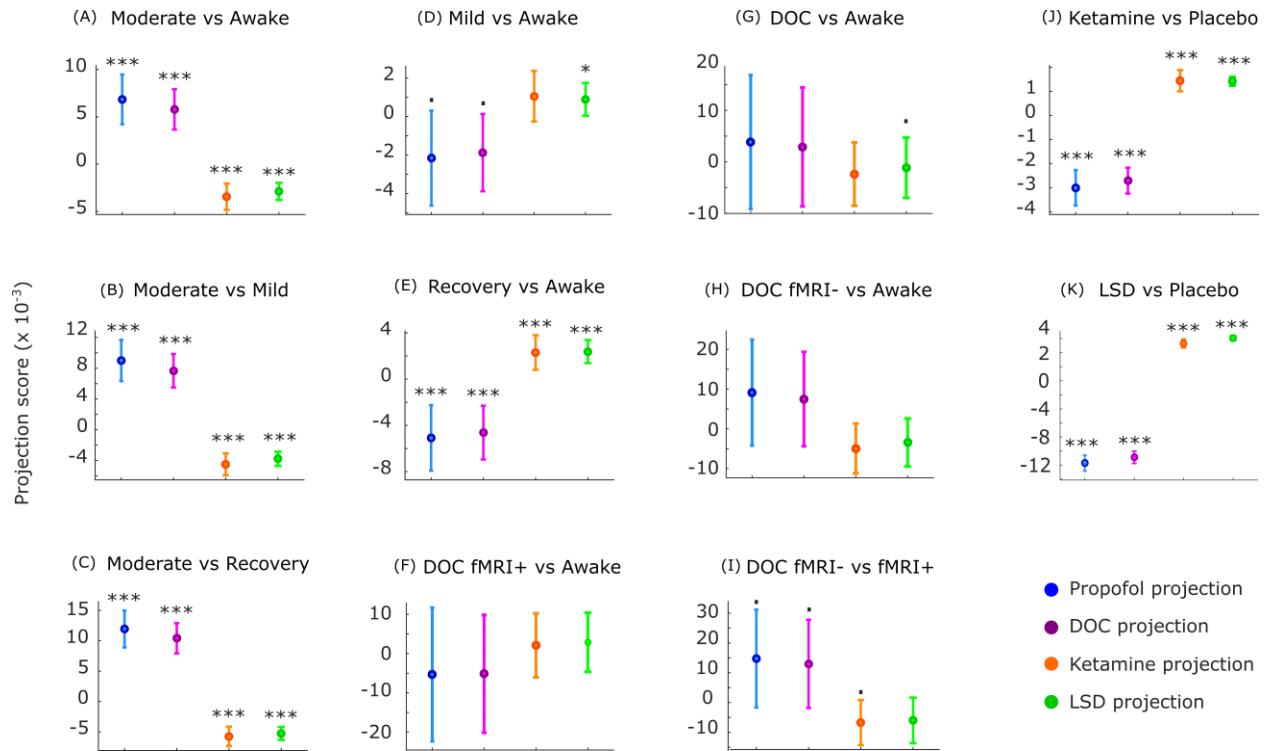

43

44 **Supplementary Figure 4. Maximally discriminative patterns of connectome harmonic energy are generalisable**  
 45 **across states of consciousness.** Each panel shows the fixed effects (and 95% CI) of contrasting the projections (dot  
 46 product) of MDC patterns from four source states (moderate propofol anaesthesia, DOC patients, ketamine and LSD)  
 47 onto each pair of the states of consciousness under comparison. (a) Moderate anaesthesia > wakefulness. (b) Moderate  
 48 anaesthesia > mild sedation. (c) Moderate anaesthesia > post-anaesthetic recovery. (d) Mild sedation > wakefulness.  
 49 (e) Post-anaesthetic recovery > wakefulness. (f) DOC fMRI+ patients > awake healthy controls. (g) DOC patients >  
 50 awake healthy controls. (h) DOC fMRI- patients > awake healthy controls. (i) fMRI- > fMRI+ DOC patients. (j)  
 51 Ketamine > placebo. (k) LSD > placebo. \*  $p < 0.05$ ; \*\*  $p < 0.01$ ; \*\*\*  $p < 0.001$ ; .  $p < 0.10$ .

52

53

54

55

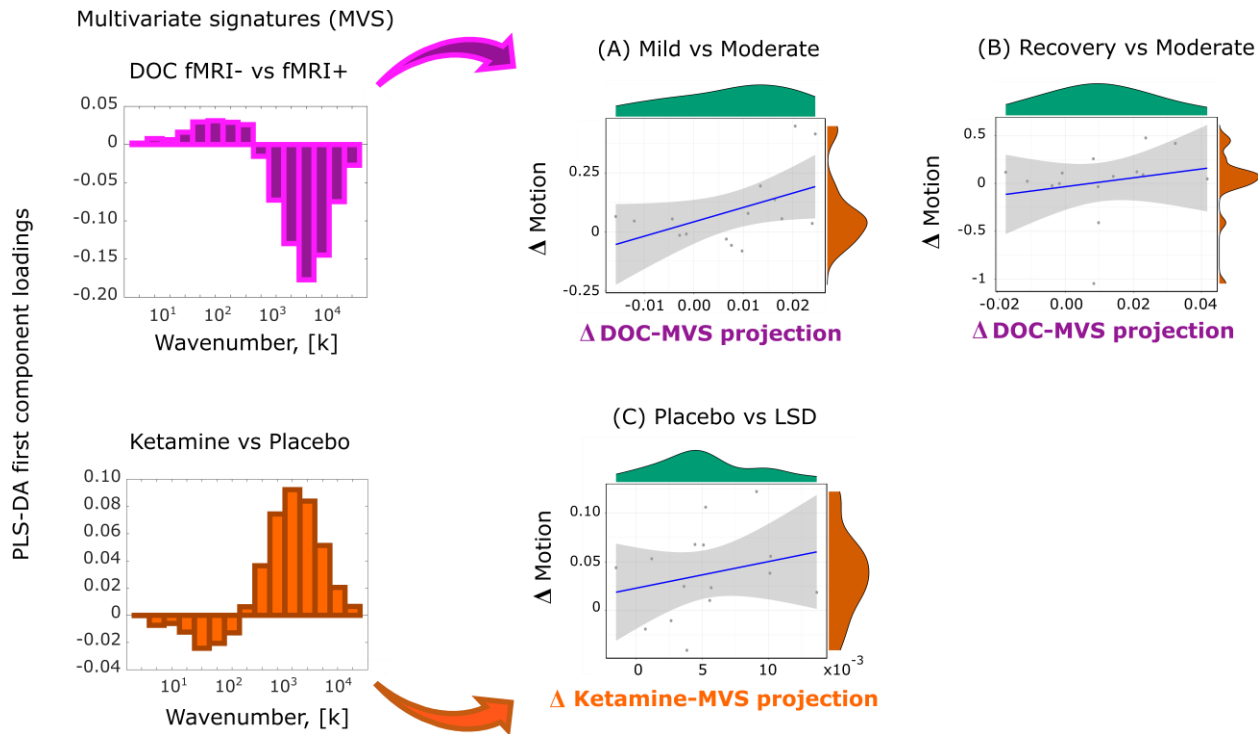

56

57

58 **Supplementary Figure 5. Change in projection onto cross-dataset multivariate energy signature (MVS) does**  
59 **not significantly correlate with differences in subject motion in the scanner.** (a) Scatterplot of delta in connectome  
60 harmonic energy projection onto the MVS derived from the DOC dataset, versus the delta in head motion (moderate  
61 anaesthesia minus mild anaesthesia). (b) Scatterplot of delta in connectome harmonic energy projection onto the MVS  
62 derived from the DOC dataset, versus the delta in head motion (moderate anaesthesia minus recovery). (c) Scatterplot  
63 of delta in connectome harmonic energy projection onto the MVS derived from the ketamine dataset, versus the delta  
64 in head motion (LSD minus placebo).

65

66

67

68

69

70

71

72

73



74 **Supplementary Tables**

75

76 **Supplementary Table 1.** LME results for total connectome harmonic energy (units are  $\times 10^{-3}$ ). \*  $p < 0.05$ ; \*\*  $p < 0.01$ ;  
 77 \*\*\*  $p < 0.001$ ; .  $p < 0.10$ ; n.s. not significant.

78

| Contrast                      | Fixed Effect | 95% CI Lower | 95% CI Upper | p-value     | Significance |
|-------------------------------|--------------|--------------|--------------|-------------|--------------|
| Awake vs fMRI-                | -5.598       | -15.603      | 4.406        | 0.273       | n.s.         |
| fMRI+ vs fMRI-                | -6.835       | -19.879      | 6.209        | 0.304       | n.s.         |
| Awake vs DOC                  | -3.113       | -12.533      | 6.307        | 0.517       | n.s.         |
| Awake vs Moderate Propofol    | -4.943       | -6.593       | -3.293       | $p < 0.001$ | ***          |
| Mild vs Moderate Propofol     | -5.724       | -7.394       | -4.055       | $p < 0.001$ | ***          |
| Recovery vs Moderate Propofol | -8.665       | -10.597      | -6.733       | $p < 0.001$ | ***          |
| Awake vs fMRI+                | 1.236        | -10.359      | 12.832       | 0.834       | n.s.         |
| Awake vs Mild Propofol        | 0.782        | -0.758       | 2.321        | 0.320       | n.s.         |
| Awake vs Recovery             | 3.722        | 1.904        | 5.541        | $p < 0.001$ | ***          |
| Placebo vs Ketamine           | 1.798        | 1.425        | 2.172        | $p < 0.001$ | ***          |
| Placebo vs LSD                | 8.101        | 7.472        | 8.730        | $p < 0.001$ | ***          |

79

80

81 **Supplementary Table 2.** LME results for the projection onto the PLS-DA first component of different states of  
 82 consciousness (units are  $\times 10^{-3}$ ). \*  $p < 0.05$ ; \*\*  $p < 0.01$ ; \*\*\*  $p < 0.001$ ; .  $p < 0.10$ ; n.s. not significant.

83

| Dataset                           | Source   | Fixed Effect | 95% CI Lower | 95% CI Upper | p-value   | Significance |
|-----------------------------------|----------|--------------|--------------|--------------|-----------|--------------|
| <b>Placebo vs LSD</b>             | propofol | -11.71       | -12.84       | -10.59       | p < 0.001 | ***          |
|                                   | DOC      | -10.88       | -11.75       | -10.01       | p < 0.001 | ***          |
|                                   | ketamine | 5.30         | 4.67         | 5.93         | p < 0.001 | ***          |
|                                   | LSD      | 6.08         | 5.74         | 6.42         | p < 0.001 | ***          |
| <b>Placebo vs Ketamine</b>        | propofol | -3.00        | -3.74        | -2.26        | p < 0.001 | ***          |
|                                   | DOC      | -2.70        | -3.24        | -2.16        | p < 0.001 | ***          |
|                                   | ketamine | 1.44         | 1.01         | 1.88         | p < 0.001 | ***          |
|                                   | LSD      | 1.42         | 1.23         | 1.61         | p < 0.001 | ***          |
| <b>Propofol Awake vs Mild</b>     | propofol | -2.16        | -4.62        | 0.31         | 0.087     | .            |
|                                   | DOC      | -1.88        | -3.88        | 0.13         | 0.067     | .            |
|                                   | ketamine | 1.06         | -0.26        | 2.37         | 0.115     |              |
|                                   | LSD      | 0.89         | 0.04         | 1.75         | 0.040     | *            |
| <b>Propofol Awake vs Recovery</b> | propofol | -5.08        | -7.92        | -2.25        | p < 0.001 | ***          |
|                                   | DOC      | -4.62        | -6.94        | -2.30        | p < 0.001 | ***          |
|                                   | ketamine | 2.30         | 0.80         | 3.79         | 0.003     | **           |
|                                   | LSD      | 2.38         | 1.38         | 3.38         | p < 0.001 | ***          |
| <b>Propofol Awake vs Moderate</b> | propofol | 6.85         | 4.23         | 9.48         | p < 0.001 | ***          |
|                                   | DOC      | 5.79         | 3.66         | 7.93         | p < 0.001 | ***          |
|                                   | ketamine | -3.45        | -4.84        | -2.06        | p < 0.001 | ***          |
|                                   | LSD      | -2.88        | -3.79        | -1.97        | p < 0.001 | ***          |
| <b>Propofol Mild vs Moderate</b>  | propofol | 9.01         | 6.33         | 11.69        | p < 0.001 | ***          |

|                                      |          |       |        |       |           |      |
|--------------------------------------|----------|-------|--------|-------|-----------|------|
|                                      | DOC      | 7.67  | 5.49   | 9.85  | p < 0.001 | ***  |
|                                      | ketamine | -4.51 | -5.93  | -3.08 | p < 0.001 | ***  |
|                                      | LSD      | -3.78 | -4.70  | -2.85 | p < 0.001 | ***  |
| <b>Propofol Recovery vs Moderate</b> | propofol | 11.94 | 8.90   | 14.97 | p < 0.001 | ***  |
|                                      | DOC      | 10.41 | 7.93   | 12.90 | p < 0.001 | ***  |
|                                      | ketamine | -5.75 | -7.34  | -4.15 | p < 0.001 | ***  |
|                                      | LSD      | -5.26 | -6.33  | -4.19 | p < 0.001 | ***  |
| <b>DOC fMRI+ vs fMRI-</b>            | propofol | 14.43 | -1.97  | 30.83 | 0.085     | .    |
|                                      | DOC      | 12.65 | -2.18  | 27.48 | 0.094     | .    |
|                                      | ketamine | -7.04 | -14.63 | 0.55  | 0.069     | .    |
|                                      | LSD      | -6.32 | -13.97 | 1.33  | 0.105     | .    |
| <b>Awake vs DOC</b>                  | propofol | 3.87  | -9.13  | 16.86 | 0.098     | .    |
|                                      | DOC      | 2.90  | -8.67  | 14.46 | 0.101     | n.s. |
|                                      | ketamine | -2.38 | -8.52  | 3.77  | 0.105     | n.s. |
|                                      | LSD      | -1.13 | -7.00  | 4.74  | 0.109     | n.s. |
| <b>Awake vs DOC fMRI+</b>            | propofol | -5.31 | -22.34 | 11.72 | 0.112     | n.s. |
|                                      | DOC      | -5.16 | -20.17 | 9.85  | 0.116     | n.s. |
|                                      | ketamine | 2.11  | -6.02  | 10.23 | 0.120     | n.s. |
|                                      | LSD      | 2.89  | -4.64  | 10.42 | 0.123     | n.s. |
| <b>Awake vs DOC fMRI-</b>            | propofol | 9.11  | -4.20  | 22.43 | 0.127     | n.s. |
|                                      | DOC      | 7.50  | -4.37  | 19.36 | 0.131     | n.s. |
|                                      | ketamine | -4.94 | -11.21 | 1.34  | 0.134     | n.s. |
|                                      | LSD      | -3.43 | -9.46  | 2.60  | 0.138     | n.s. |

84

85

86

87

88 **Supplementary Table 3.** Correlations of cross-dataset projections onto MDCs with mean motion difference.  $p < 0.10$ ;  
 89 n.s. not significant.  
 90

|                                                        | Spearman's $\rho$ | CI 95%        | p-value | Sig  |
|--------------------------------------------------------|-------------------|---------------|---------|------|
| Moderate-Mild Motion Delta vs DOC Projection Delta     | 0.45              | [-0.08; 0.78] | 0.089   | .    |
| Moderate-Recovery Motion Delta vs DOC Projection Delta | 0.31              | [-0.24; 0.71] | 0.254   | n.s. |
| LSD-Placebo Motion Delta vs Ketamine Projection Delta  | 0.24              | [-0.31; 0.67] | 0.383   | n.s. |

91  
 92  
 93 **Supplementary Table 4.** LME results for repertoire diversity of the connectome harmonics. \*  $p < 0.05$ ; \*\*  $p < 0.01$ ;  
 94 \*\*\*  $p < 0.001$ ; \*\*  $p < 0.01$ ; .  $p < 0.10$ ; n.s. not significant.  
 95

| Contrast                      | Fixed Effect | 95% CI Lower | 95% CI Upper | p-value     | Significance |
|-------------------------------|--------------|--------------|--------------|-------------|--------------|
| Awake vs fMRI-                | -0.074       | -0.129       | -0.018       | 0.009       | **           |
| fMRI+ vs fMRI-                | -0.063       | -0.133       | 0.007        | 0.079       | .            |
| Awake vs DOC                  | -0.051       | -0.102       | 0.000        | 0.051       | .            |
| Awake vs Moderate Propofol    | -0.039       | -0.052       | -0.026       | $p < 0.001$ | ***          |
| Mild vs Moderate Propofol     | -0.040       | -0.054       | -0.027       | $p < 0.001$ | ***          |
| Recovery vs Moderate Propofol | -0.040       | -0.055       | -0.025       | $p < 0.001$ | ***          |
| Awake vs fMRI+                | -0.011       | -0.064       | 0.042        | 0.691       | n.s.         |
| Awake vs Mild Propofol        | 0.001        | -0.011       | 0.013        | 0.880       | n.s.         |
| Awake vs Recovery             | 0.001        | -0.013       | 0.014        | 0.928       | n.s.         |
| Placebo vs Ketamine           | 0.020        | 0.016        | 0.024        | $p < 0.001$ | ***          |
| Placebo vs LSD                | 0.054        | 0.049        | 0.059        | $p < 0.001$ | ***          |

96  
 97  
 98
